# Supplementary material for: Synthesis and cytotoxic activity of madecassic acid–silybin conjugate compounds in liver cancer cells
Source: Royal Society of Chemistry journal article supplement (doi:10.1039/d4md00170b), 2024-01-01
Supplement: d4md00170b1.pdf [file d4md00170b1.pdf]

SUPPORTING INFORMATION

**SYNTHESIS AND CYTOTOXIC ACTIVITY OF MADECASSIC ACID – SILYBIN  
CONJUGATE COMPOUNDS IN LIVER CANCER CELLS**

Tran Van Chien <sup>a,b</sup>, Tran Thi Phuong Thao <sup>a,b</sup>, Nguyen The Anh <sup>a</sup>, Tran Van Loc <sup>a</sup>, Pham Thi Ninh <sup>a</sup>,  
Nguyen Thi Luu <sup>a</sup>, Nguyen Thi Dung <sup>a</sup>, Michelle D. Garrett <sup>c</sup>, Nguyen Thi Nga <sup>d</sup>, Do Thi Thao <sup>d</sup>,  
Christopher J. Serpell <sup>e,\*</sup>, Tran Van Sung <sup>a,\*</sup>

<sup>a</sup> Institute of Chemistry, Vietnam Academy of Science and Technology, 18 Hoang Quoc Viet Road, Cau Giay, Hanoi, Vietnam

<sup>b</sup> Graduate University of Science and Technology, Vietnam Academy of Science and Technology, 18 Hoang Quoc Viet Road, Cau Giay, Hanoi, Vietnam

<sup>c</sup> School of Biosciences, Stacey Building, University of Kent, Canterbury, Kent CT2 7NJ, UK

<sup>d</sup> Institute of Biotechnology, Vietnam Academy of Science and Technology, 18 Hoang Quoc Viet Road, Cau Giay, Hanoi, Vietnam

<sup>e</sup> Department of Pharmaceutical and Biological Chemistry, School of Pharmacy, University College London, 29-39 Brunswick Square, London, WC1N 1AX, UK

## Table of Contents

|                                                                                                                      |    |
|----------------------------------------------------------------------------------------------------------------------|----|
| Figure S1. <sup>1</sup> H and <sup>13</sup> C NMR (CDCl <sub>3</sub> , 500 MHz) spectra of compound <b>3</b> .....   | 1  |
| Figure S2. ESI-MS spectrum of compound <b>3</b> .....                                                                | 2  |
| Figure S3. <sup>1</sup> H and <sup>13</sup> C NMR (CDCl <sub>3</sub> , 500 MHz) spectra of compound <b>4</b> .....   | 3  |
| Figure S4. ESI-MS spectrum of compound <b>4</b> .....                                                                | 3  |
| Figure S5. <sup>1</sup> H and <sup>13</sup> C NMR (CDCl <sub>3</sub> , 500 MHz) spectra of compound <b>5</b> .....   | 4  |
| Figure S6. ESI-MS spectrum of compound <b>5</b> .....                                                                | 5  |
| Figure S7. <sup>1</sup> H and <sup>13</sup> C NMR (CDCl <sub>3</sub> , 600 MHz) spectra of compound <b>6</b> .....   | 6  |
| Figure S8. ESI-MS spectrum of compound <b>6</b> .....                                                                | 6  |
| Figure S9. <sup>1</sup> H and <sup>13</sup> C NMR (CDCl <sub>3</sub> , 600 MHz) spectra of compound <b>7</b> .....   | 7  |
| Figure S10. ESI-MS spectrum of compound <b>7</b> .....                                                               | 8  |
| Figure S11. <sup>1</sup> H and <sup>13</sup> C NMR (CD <sub>3</sub> OD, 600 MHz) spectra of compound <b>8</b> .....  | 9  |
| Figure S12. ESI-MS spectrum of compound <b>8</b> .....                                                               | 9  |
| Figure S13. HPLC analysis of compound <b>8</b> .....                                                                 | 10 |
| Figure S14. <sup>1</sup> H NMR (CD <sub>3</sub> OD, 600 MHz) spectrum of compound <b>9</b> .....                     | 10 |
| Figure S15. ESI-MS spectrum of compound <b>9</b> .....                                                               | 11 |
| Figure S16. HPLC analysis of compound <b>9</b> .....                                                                 | 11 |
| Figure S17. <sup>1</sup> H and <sup>13</sup> C NMR (CDCl <sub>3</sub> , 500 MHz) spectra of compound <b>10</b> ..... | 12 |
| Figure S18. ESI-MS spectrum of compound <b>10</b> .....                                                              | 13 |
| Figure S19. HPLC analysis of compound <b>10</b> .....                                                                | 13 |
| Figure S20. <sup>1</sup> H and <sup>13</sup> C NMR (CDCl <sub>3</sub> , 500 MHz) spectra of compound <b>11</b> ..... | 14 |
| Figure S21. ESI-MS spectrum of compound <b>11</b> .....                                                              | 15 |
| Figure S22. <sup>1</sup> H and <sup>13</sup> C NMR (CDCl <sub>3</sub> , 500 MHz) spectra of compound <b>12</b> ..... | 16 |
| Figure S23. ESI-MS spectrum of compound <b>12</b> .....                                                              | 16 |
| Figure S24. <sup>1</sup> H and <sup>13</sup> C NMR (CDCl <sub>3</sub> , 500 MHz) spectra of compound <b>13</b> ..... | 17 |
| Figure S25. ESI-MS spectrum of compound <b>13</b> .....                                                              | 18 |
| Figure S26. <sup>1</sup> H and <sup>13</sup> C NMR (CDCl <sub>3</sub> , 500 MHz) spectra of compound <b>14</b> ..... | 19 |
| Figure S27. ESI-MS spectrum of compound <b>14</b> .....                                                              | 19 |
| Figure S28. <sup>1</sup> H and <sup>13</sup> C NMR (CDCl <sub>3</sub> , 500 MHz) spectra of compound <b>15</b> ..... | 20 |
| Figure S29. ESI-MS spectrum of compound <b>15</b> .....                                                              | 21 |
| Figure S30. HPLC analysis of compound <b>15</b> .....                                                                | 21 |
| Figure S31. <sup>1</sup> H and <sup>13</sup> C NMR (CDCl <sub>3</sub> , 500 MHz) spectra of compound <b>16</b> ..... | 22 |
| Figure S32. ESI-MS spectrum of compound <b>16</b> .....                                                              | 23 |
| Figure S33. HPLC analysis of compound <b>16</b> .....                                                                | 23 |
| Figure S34. <sup>1</sup> H and <sup>13</sup> C NMR (CDCl <sub>3</sub> , 500 MHz) spectra of compound <b>17</b> ..... | 24 |
| Figure S35. ESI-MS spectrum of compound <b>17</b> .....                                                              | 25 |
| Figure S36. <sup>1</sup> H and <sup>13</sup> C NMR (CDCl <sub>3</sub> , 500 MHz) spectra of compound <b>18</b> ..... | 26 |
| Figure S37. ESI-MS spectrum of compound <b>18</b> .....                                                              | 26 |

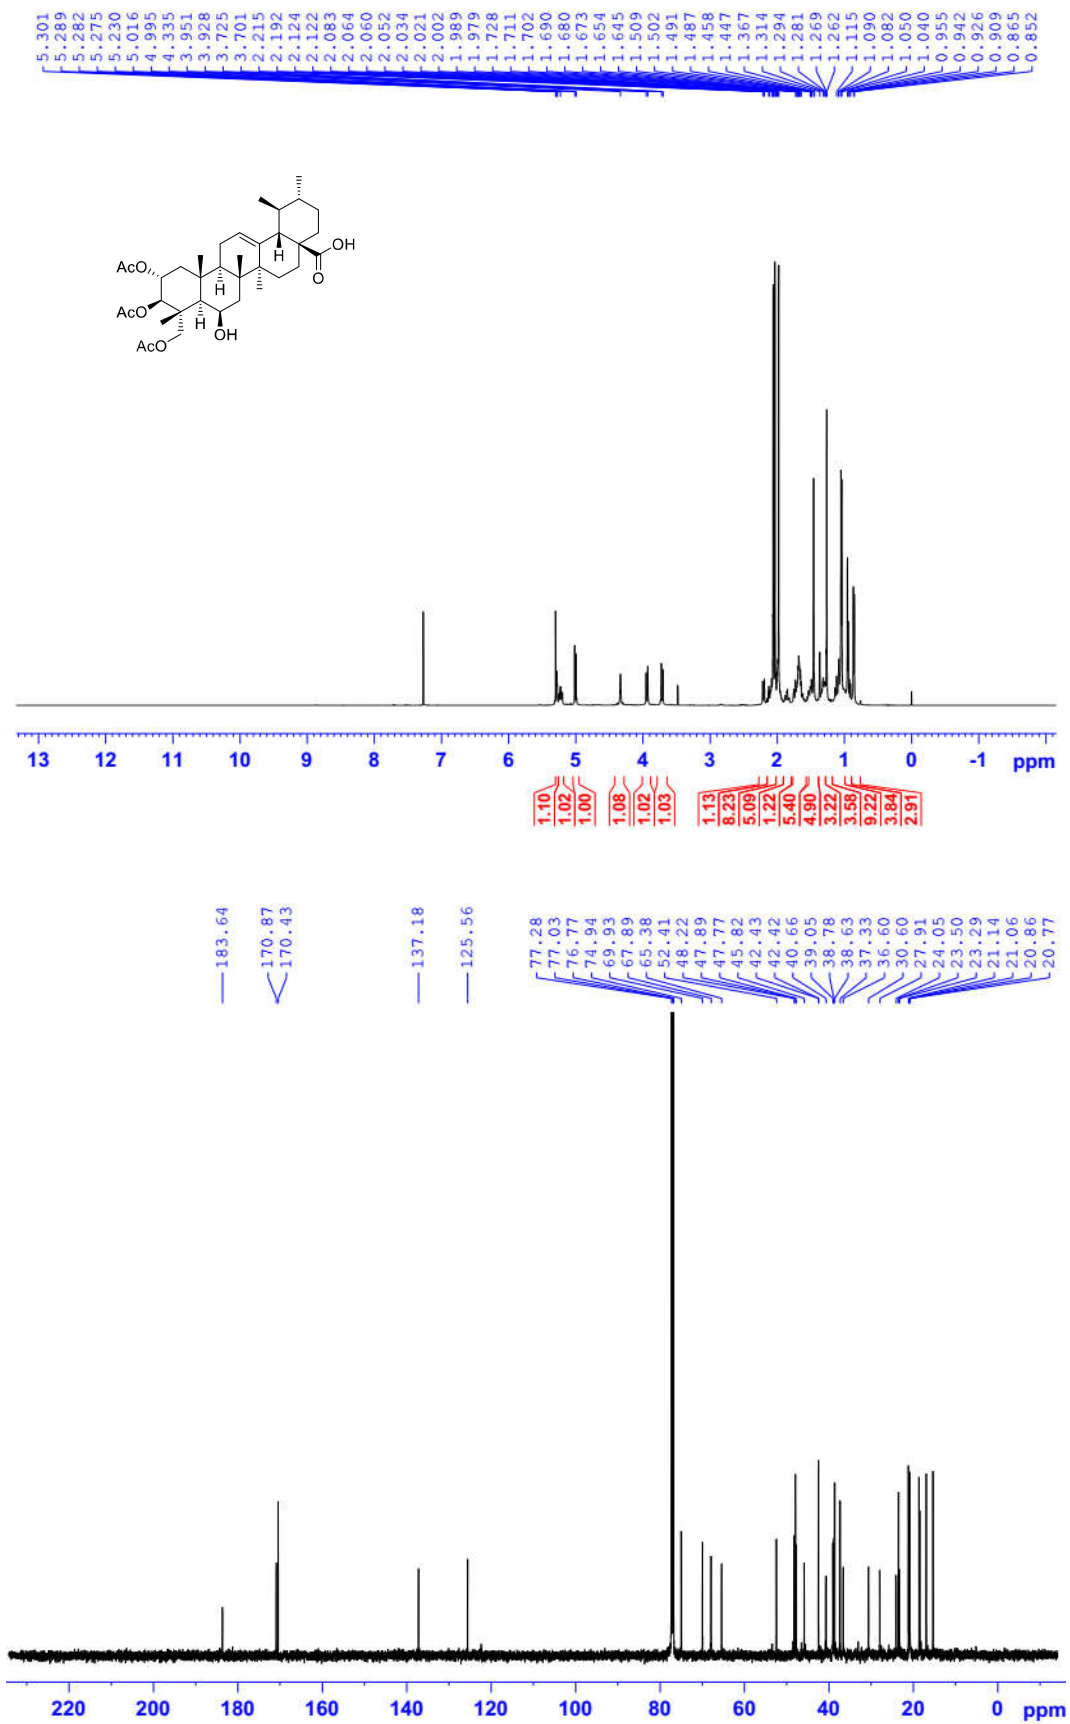

Figure S1. <sup>1</sup>H and <sup>13</sup>C NMR (CDCl<sub>3</sub>, 500 MHz) spectra of compound 3

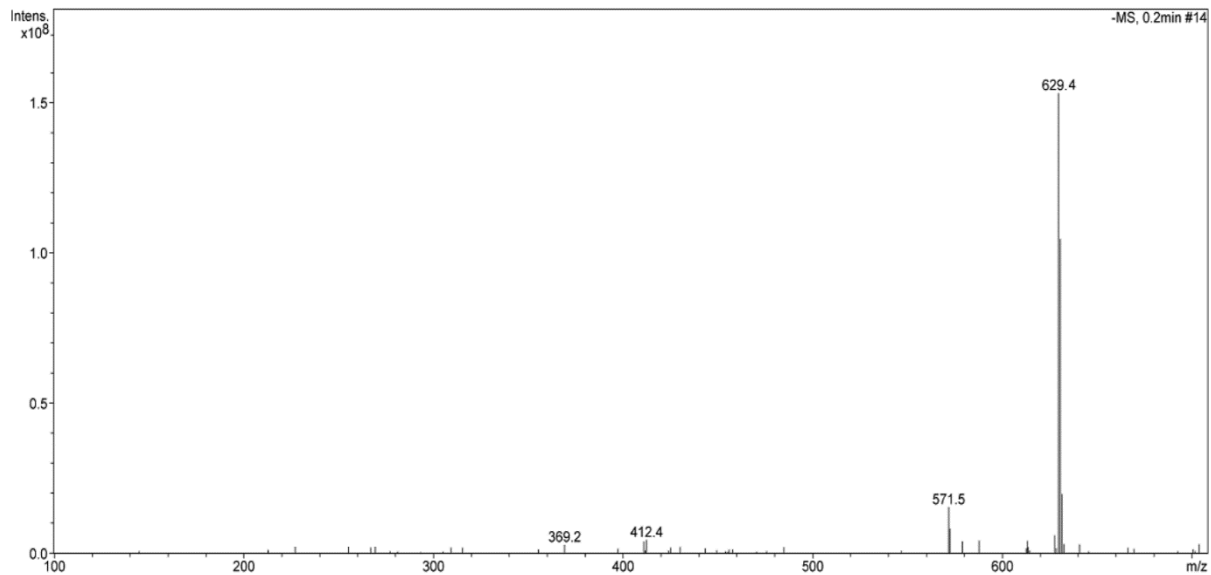

Figure S2. ESI-MS spectrum of compound 3

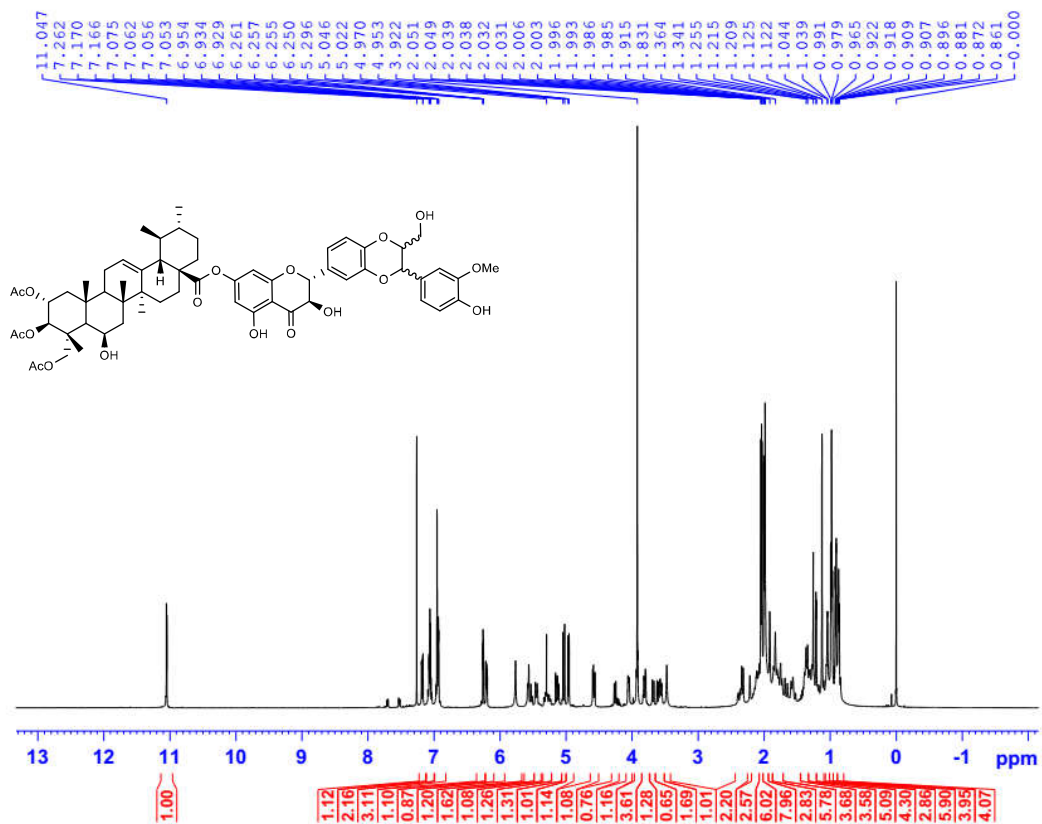

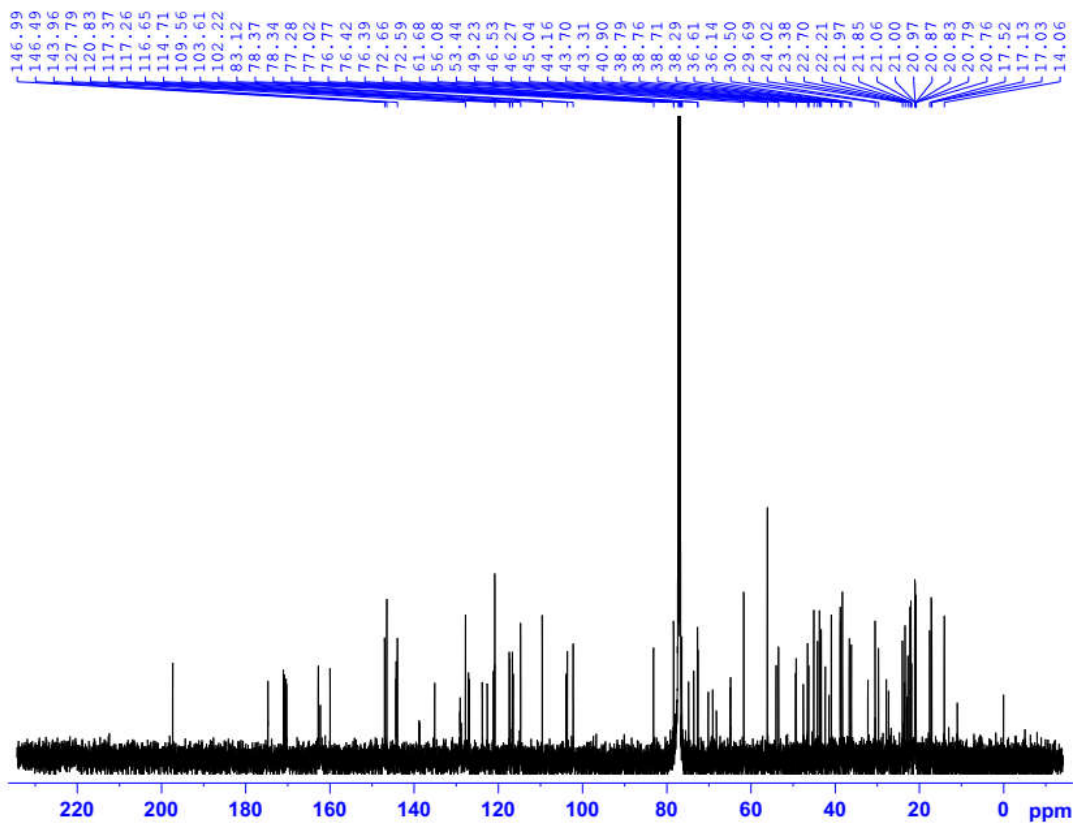

Figure S3. <sup>1</sup>H and <sup>13</sup>C NMR (CDCl<sub>3</sub>, 500 MHz) spectra of compound **4**

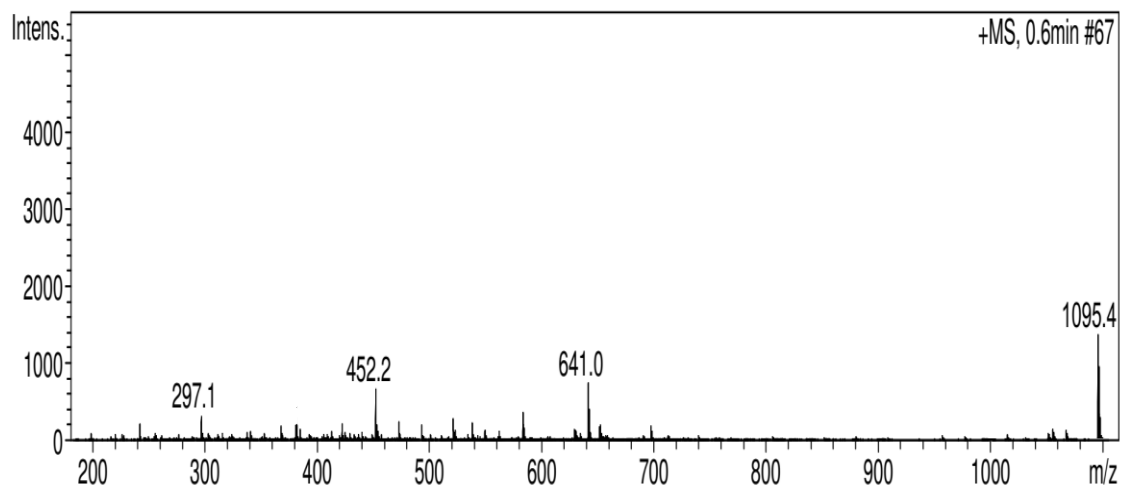

Figure S4. ESI-MS spectrum of compound **4**

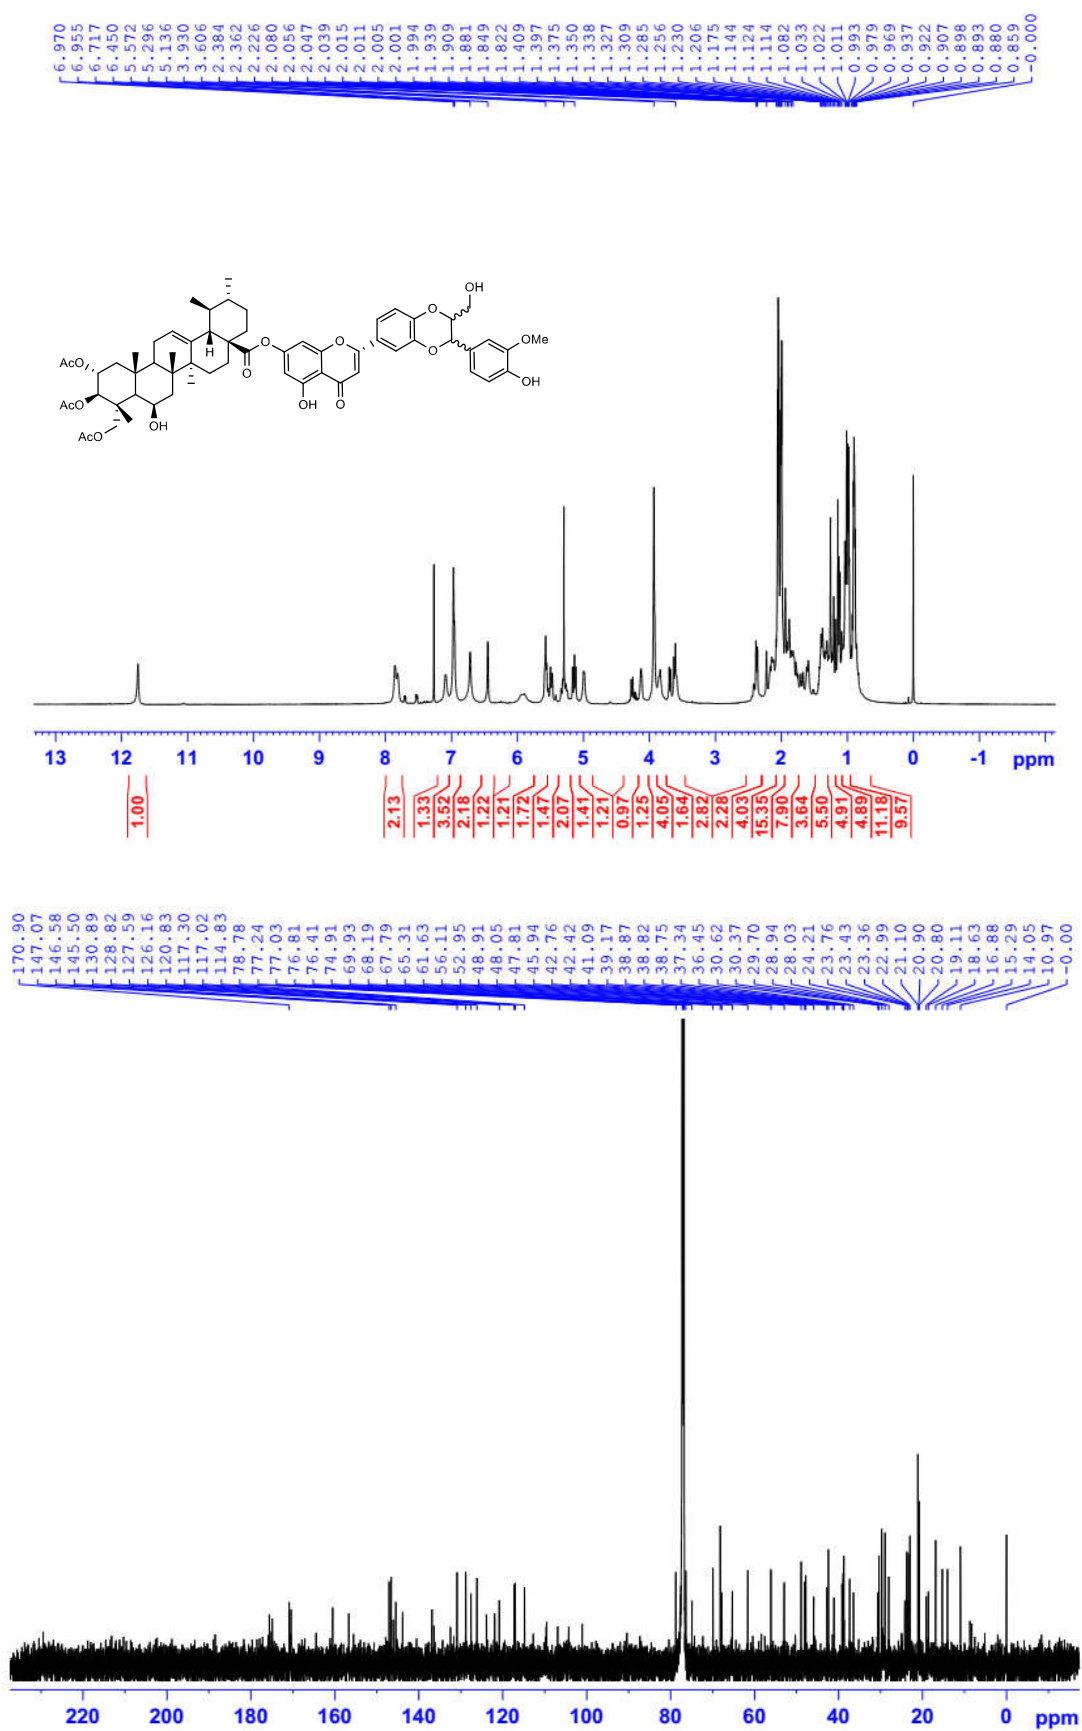

Figure S5. <sup>1</sup>H and <sup>13</sup>C NMR (CDCl<sub>3</sub>, 500 MHz) spectra of compound 5

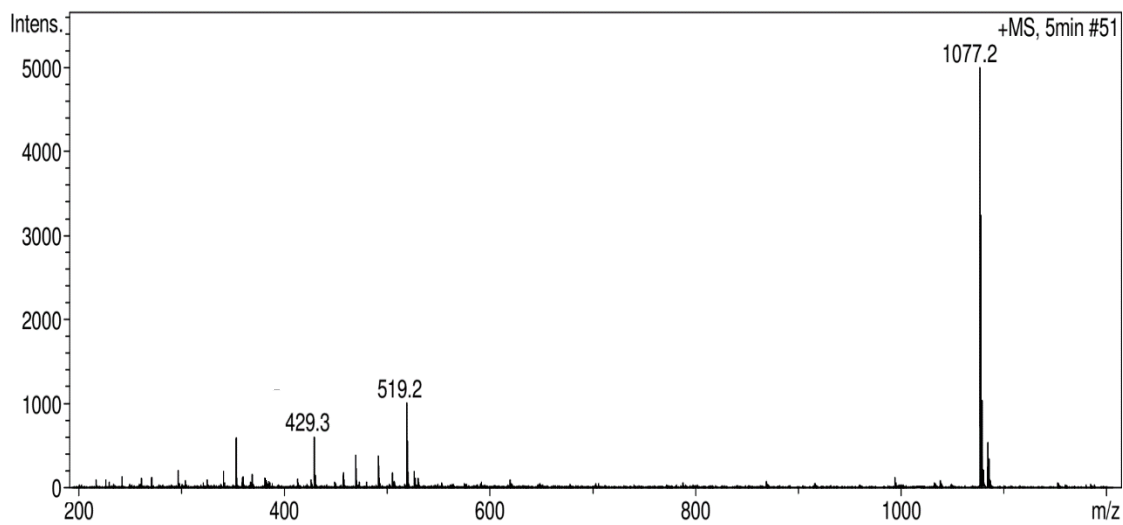

Figure S6. ESI-MS spectrum of compound 5

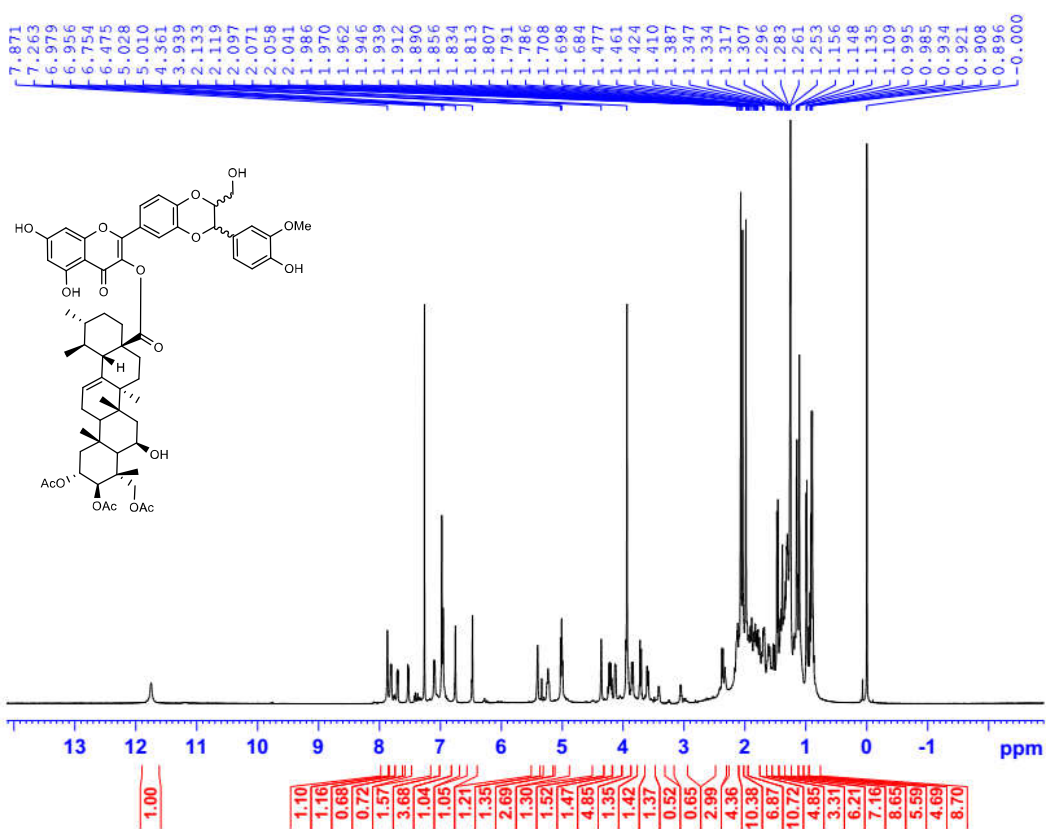

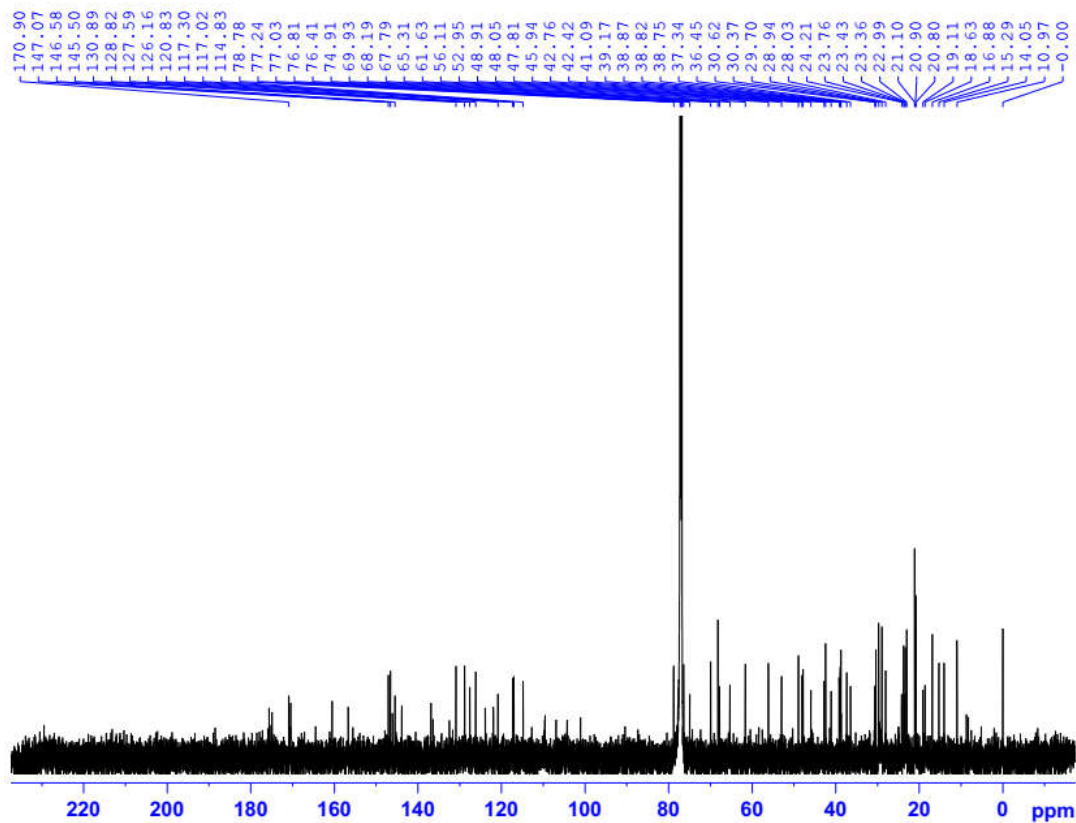

Figure S7.  $^1\text{H}$  and  $^{13}\text{C}$  NMR ( $\text{CDCl}_3$ , 600 MHz) spectra of compound **6**

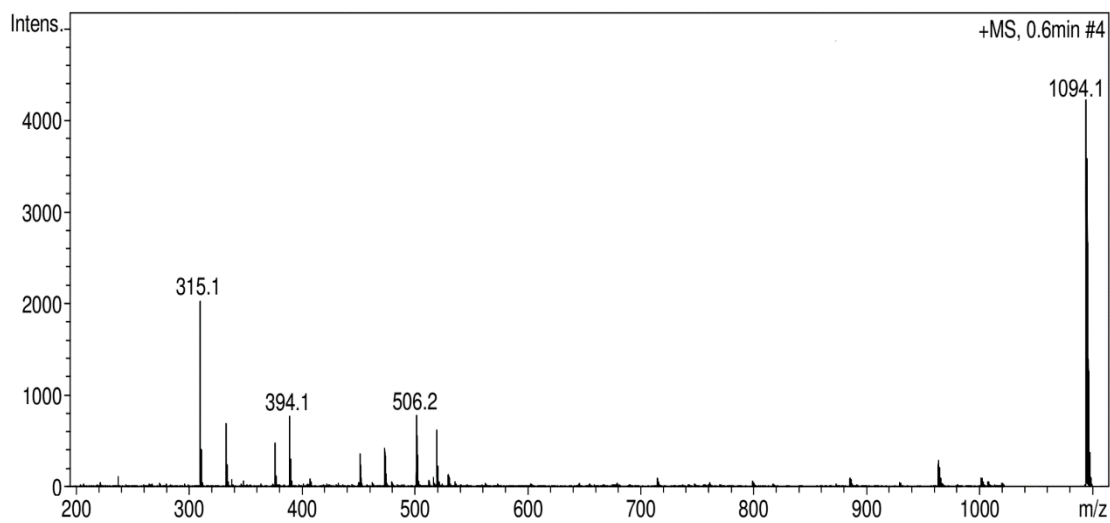

Figure S8. ESI-MS spectrum of compound **6**



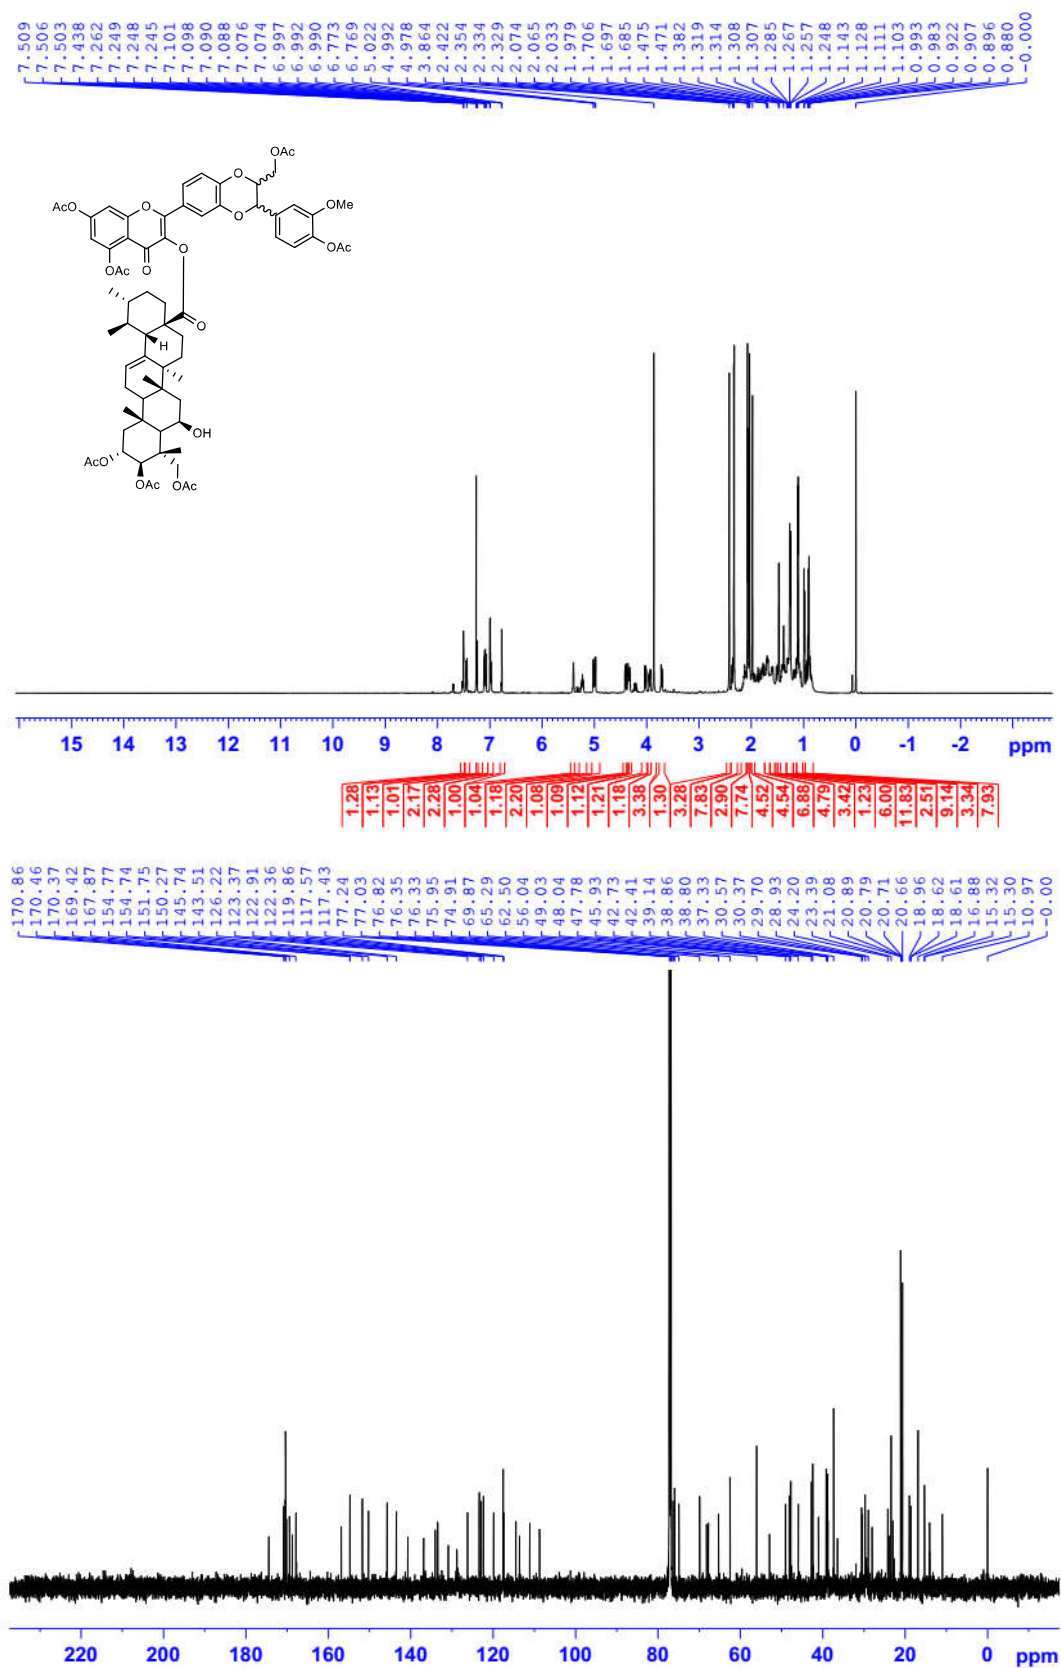

Figure S9. <sup>1</sup>H and <sup>13</sup>C NMR (CDCl<sub>3</sub>, 600 MHz) spectra of compound 7

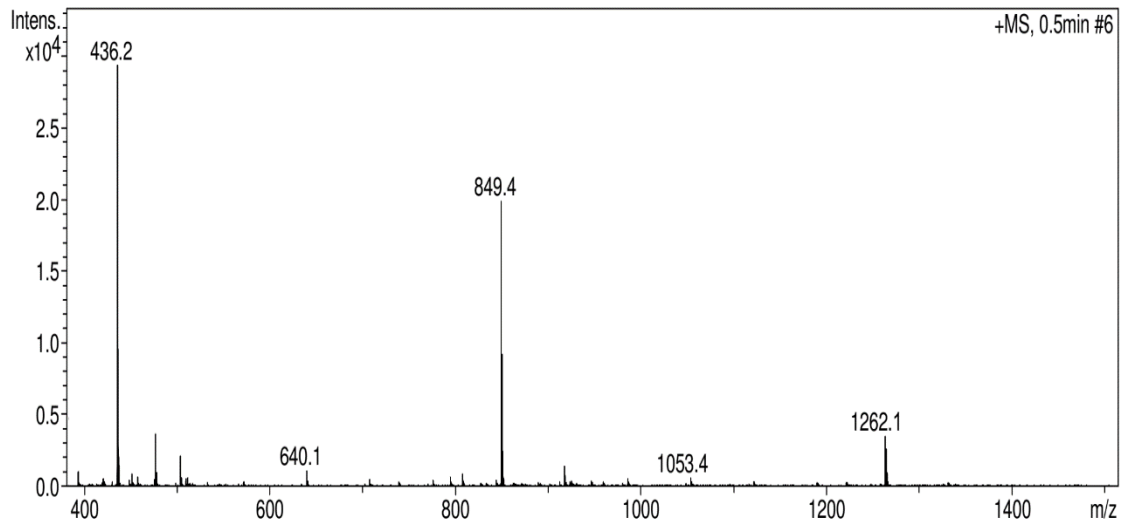

Figure S10. ESI-MS spectrum of compound 7

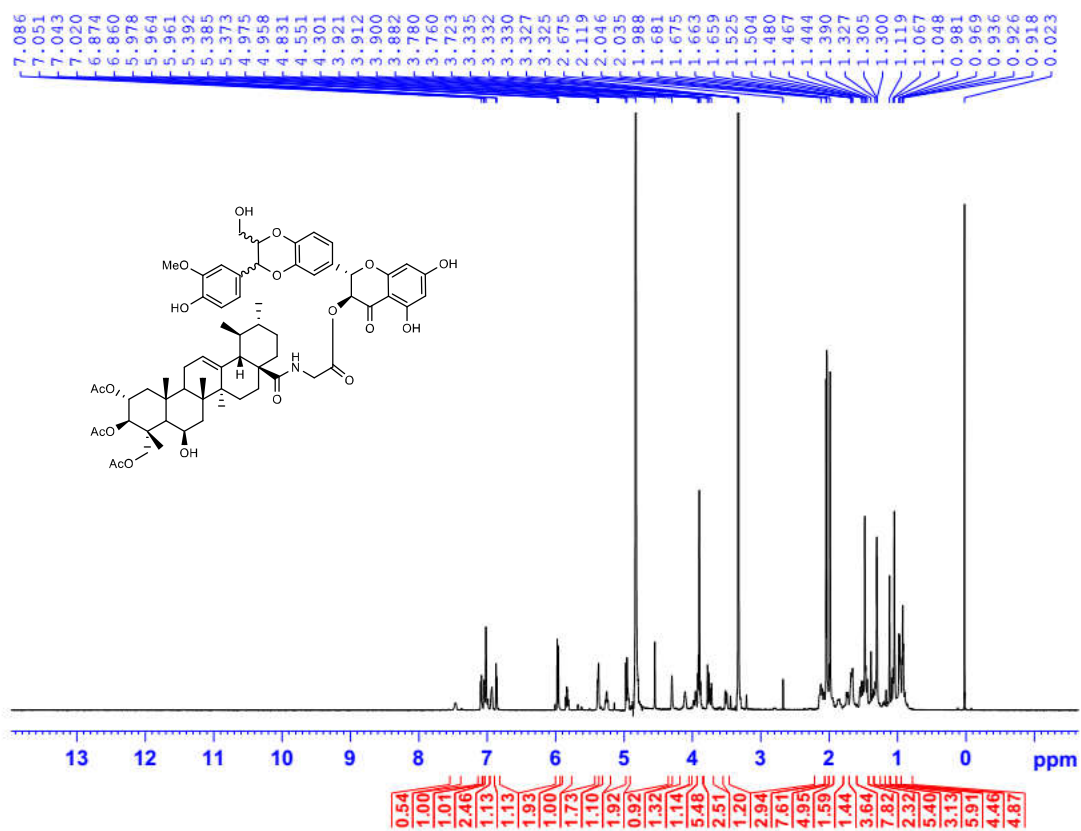

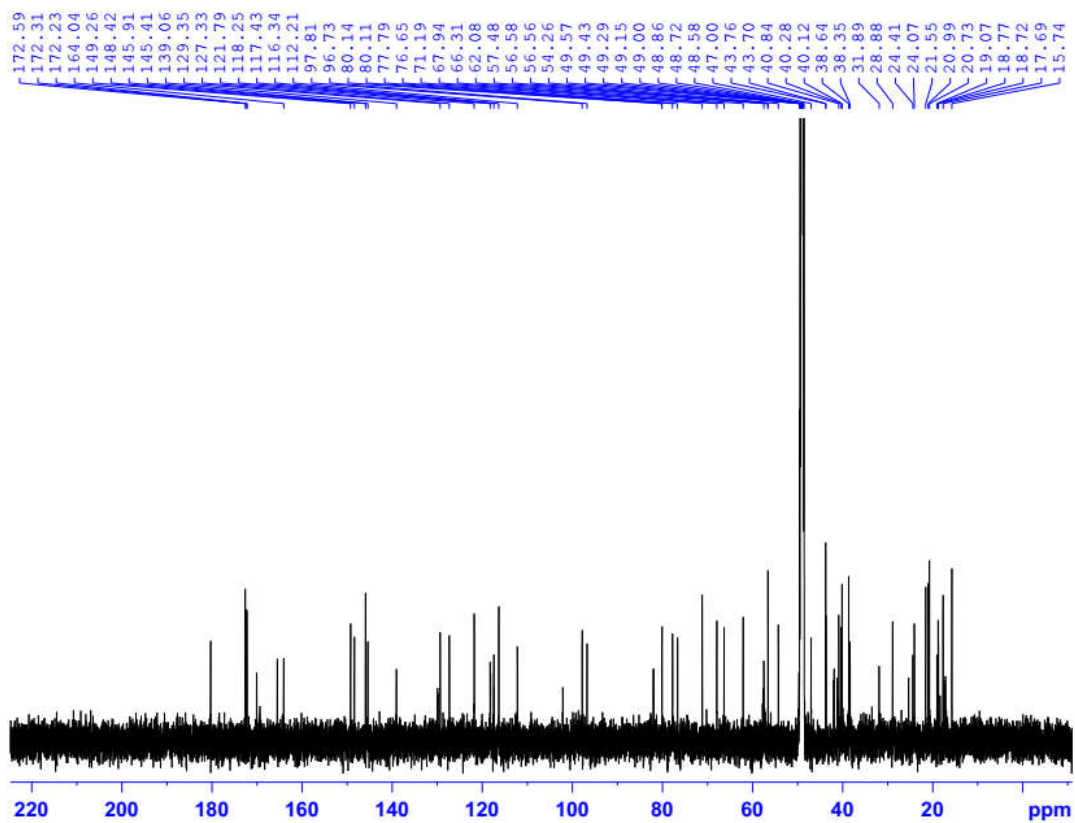

Figure S11.  $^1\text{H}$  and  $^{13}\text{C}$  NMR ( $\text{CD}_3\text{OD}$ , 600 MHz) spectra of compound **8**

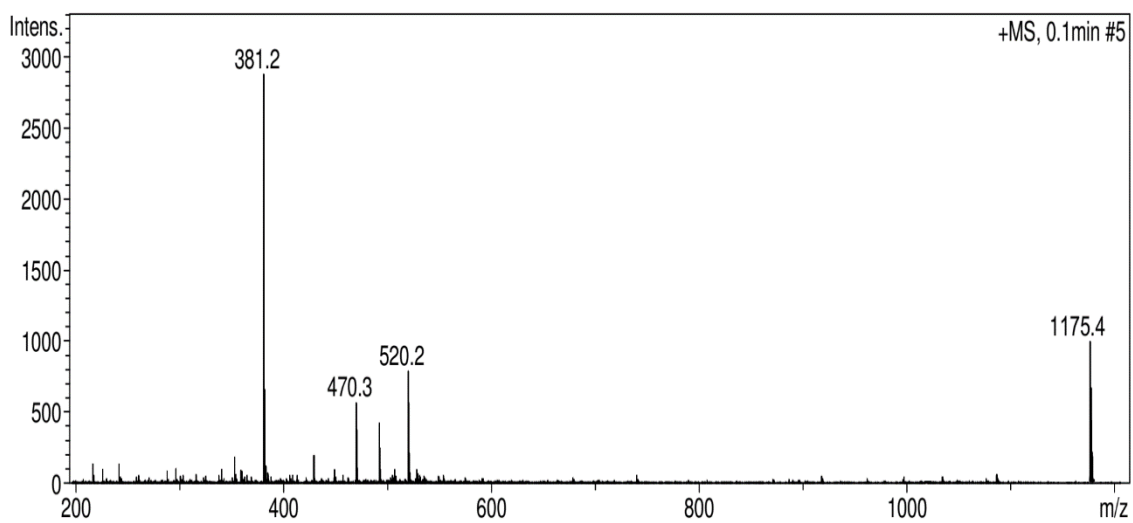

Figure S12. ESI-MS spectrum of compound **8**

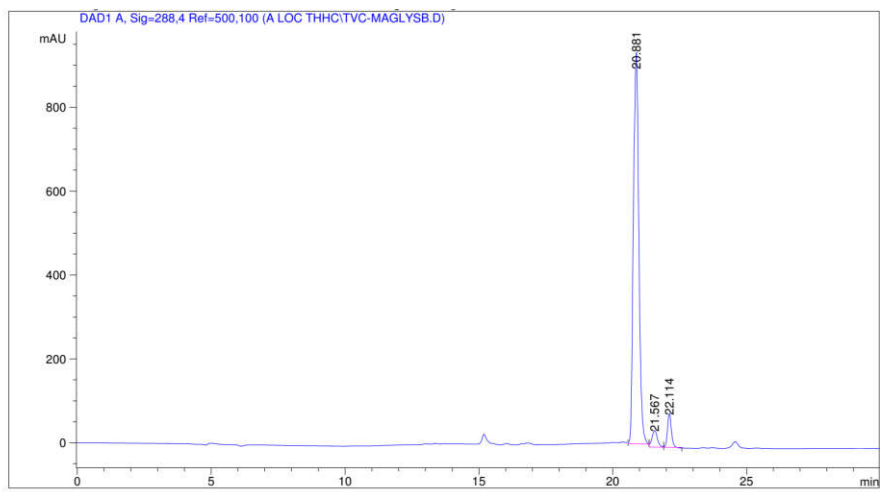

=====  
Area Percent Report  
=====

Sorted By : Signal  
Multiplier : 1.0000  
Dilution : 1.0000  
Use Multiplier & Dilution Factor with ISTDs

Signal 1: DAD1 A, Sig=288,4 Ref=500,100

| Peak # | RetTime [min] | Type | Width [min] | Area [mAU*s] | Height [mAU] | Area %  |
|--------|---------------|------|-------------|--------------|--------------|---------|
| 1      | 20.881        | VV   | 0.2330      | 1.46603e4    | 943.20337    | 95.1972 |
| 2      | 21.567        | VV   | 0.2272      | 343.86725    | 41.41860     | 2.2359  |
| 3      | 22.114        | VB   | 0.1622      | 394.74591    | 82.19529     | 2.5668  |

Totals : 1.53789e4 1066.81726

Figure S13. HPLC analysis of compound **8**

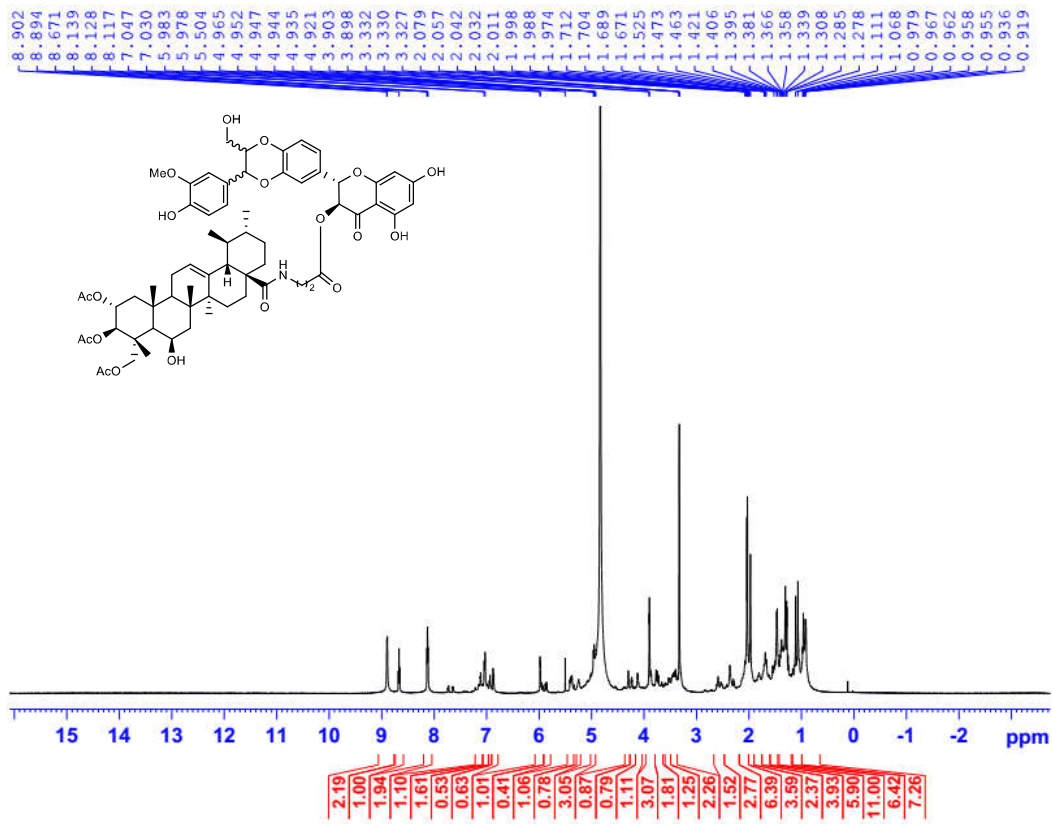

Figure S14. <sup>1</sup>H NMR (CD<sub>3</sub>OD, 600 MHz) spectrum of compound **9**

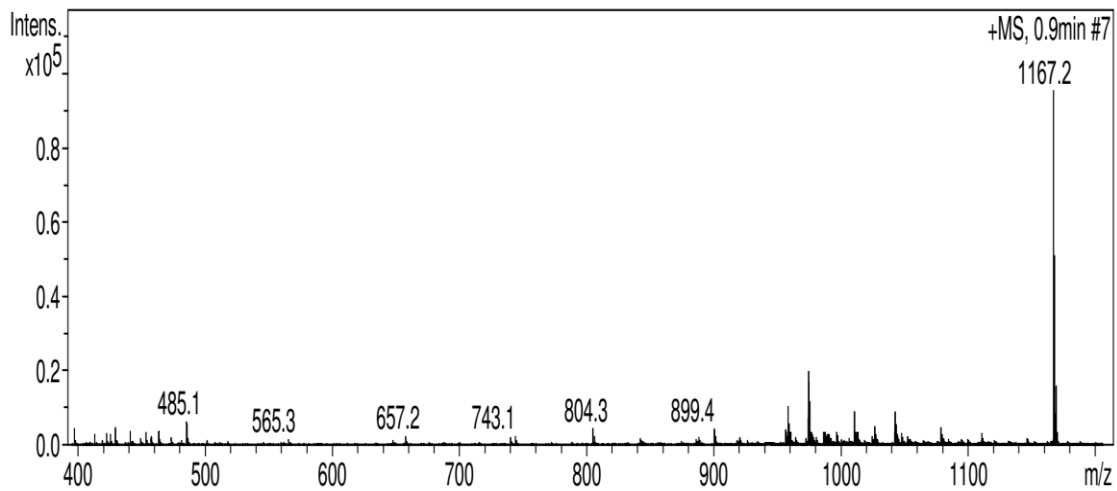

Figure S15. ESI-MS spectrum of compound 9

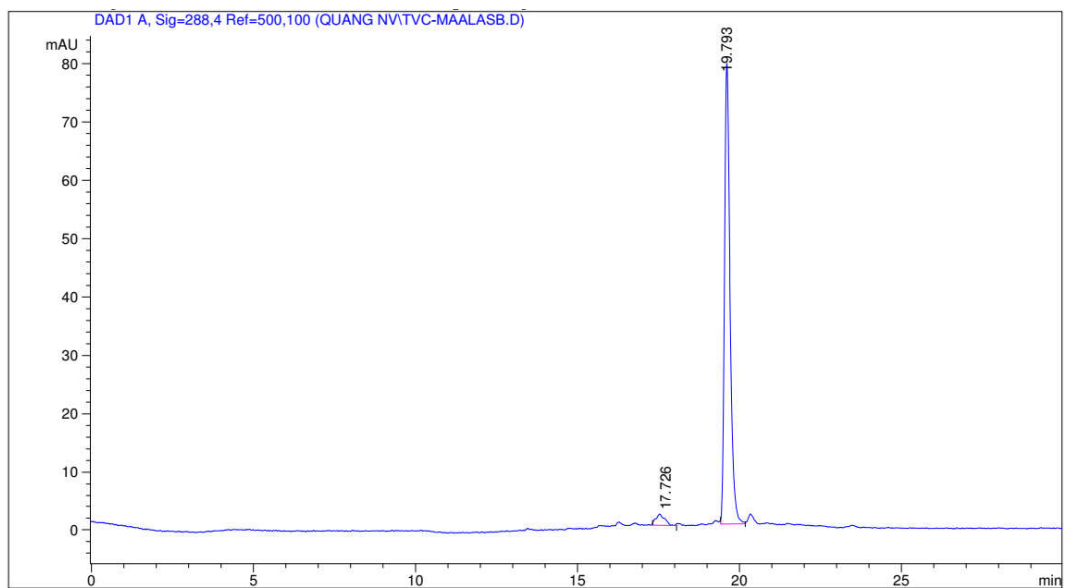

```

=====
                          Area Percent Report
=====
Sorted By      :      Signal
Multiplier     :      1.0000
Dilution       :      1.0000
Use Multiplier & Dilution Factor with ISTDs

Signal 1: DAD1 A, Sig=288,4 Ref=500,100

Peak RetTime Type Width Area Height Area
# [min] [min] [min] [mAU*s] [mAU] %
-----|-----|-----|-----|-----|
1 17.726 BV 0.2523 37.34469 1.92501 5.8241
2 19.793 VB 0.1797 939.22766 79.58216 94.1759
Totals :                      976.57235 81.50717

```

Figure S16. HPLC analysis of compound 9

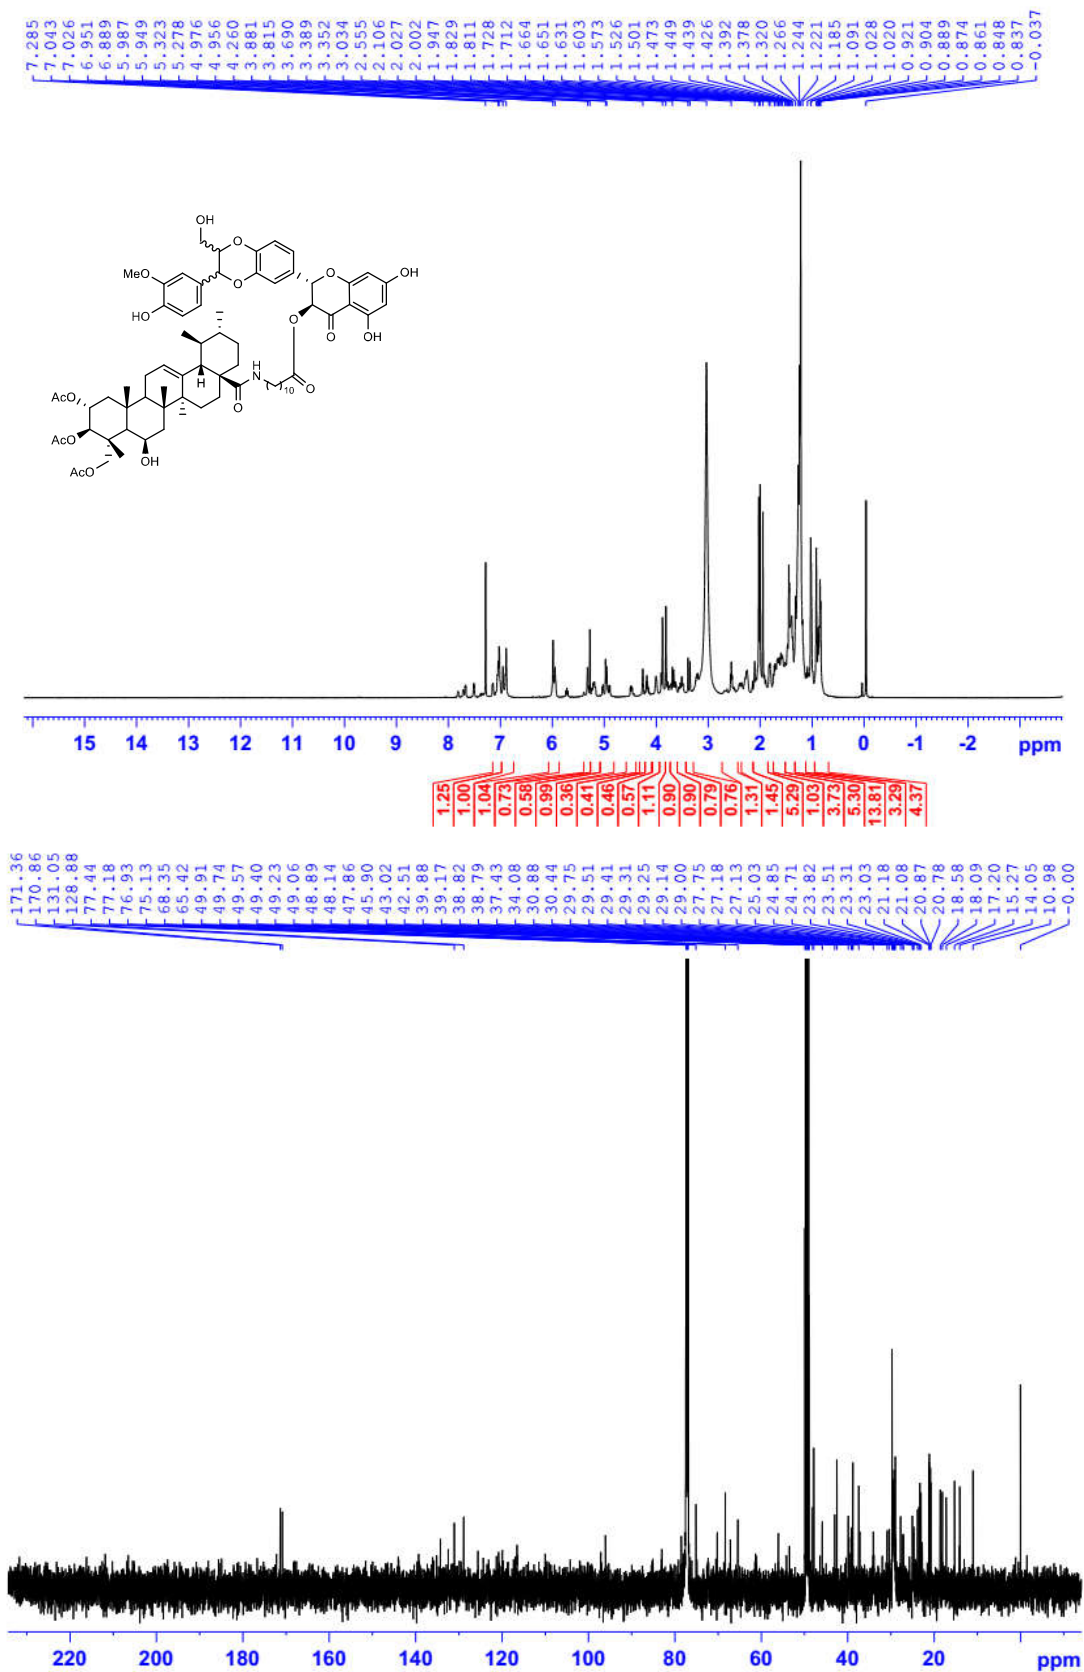

Figure S17. <sup>1</sup>H and <sup>13</sup>C NMR (CDCl<sub>3</sub>, 500 MHz) spectra of compound 10

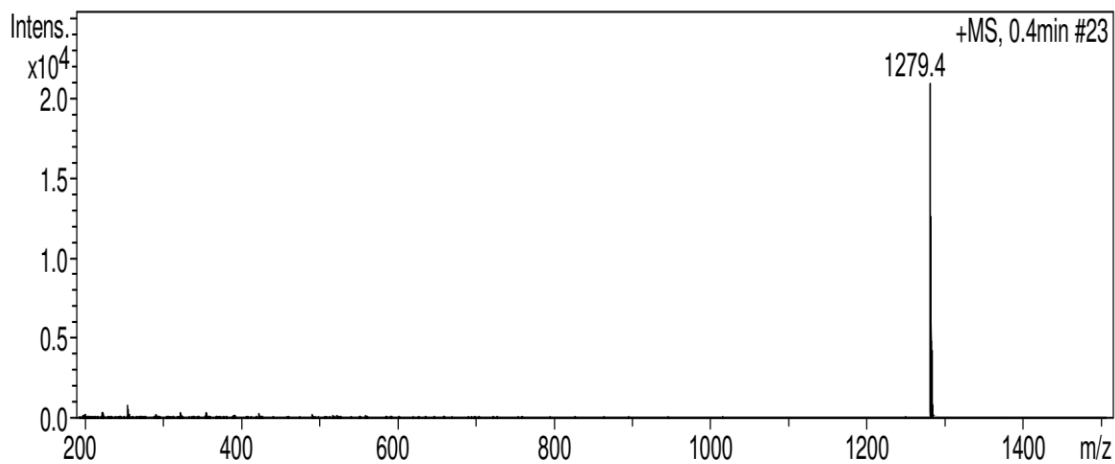

Figure S18. ESI-MS spectrum of compound 10

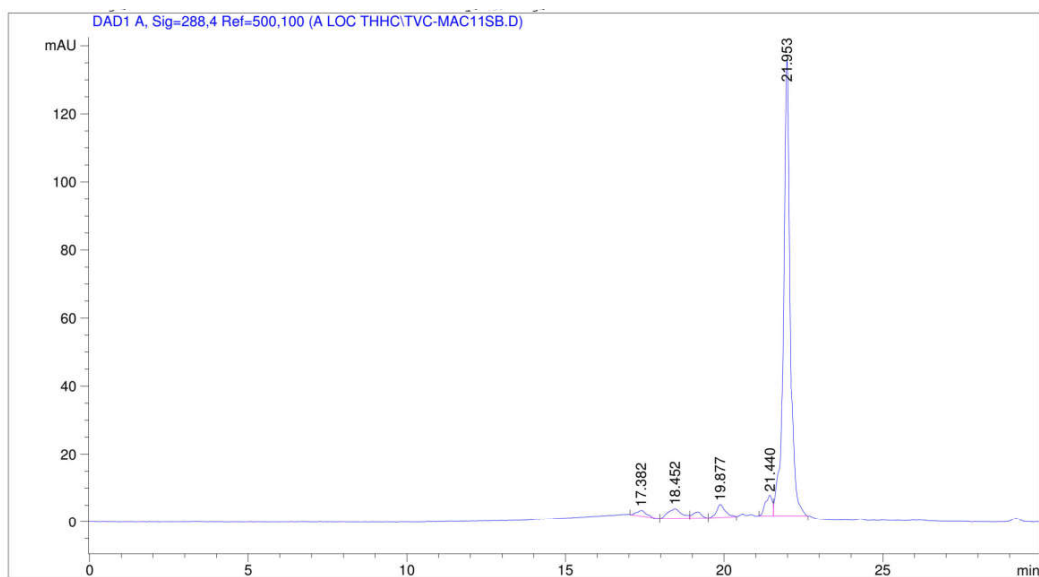

```

=====
                          Area Percent Report
=====
Sorted By      :      Signal
Multiplier     :      1.0000
Dilution      :      1.0000
Use Multiplier & Dilution Factor with ISTDs

Signal 1: DAD1 A, Sig=288,4 Ref=500,100

Peak RetTime Type  Width   Area   Height   Area
#   [min]         [min] [mAU*s] [mAU]    %
-----|-----|-----|-----|-----|-----
  1  17.382  BB    0.2435  23.43523  1.68535  0.6321
  2  18.452  BV    0.3712  58.01112  2.87418  1.5647
  3  19.877  VV    0.2672  64.86910  3.87856  1.7497
  4  21.440  BV    0.2092  74.20120  6.13362  2.0015
  5  21.953  VV    0.2035 3486.84570 134.15177 94.0519

Totals :                               3707.36235  148.72348

```

Figure S19. HPLC analysis of compound 10



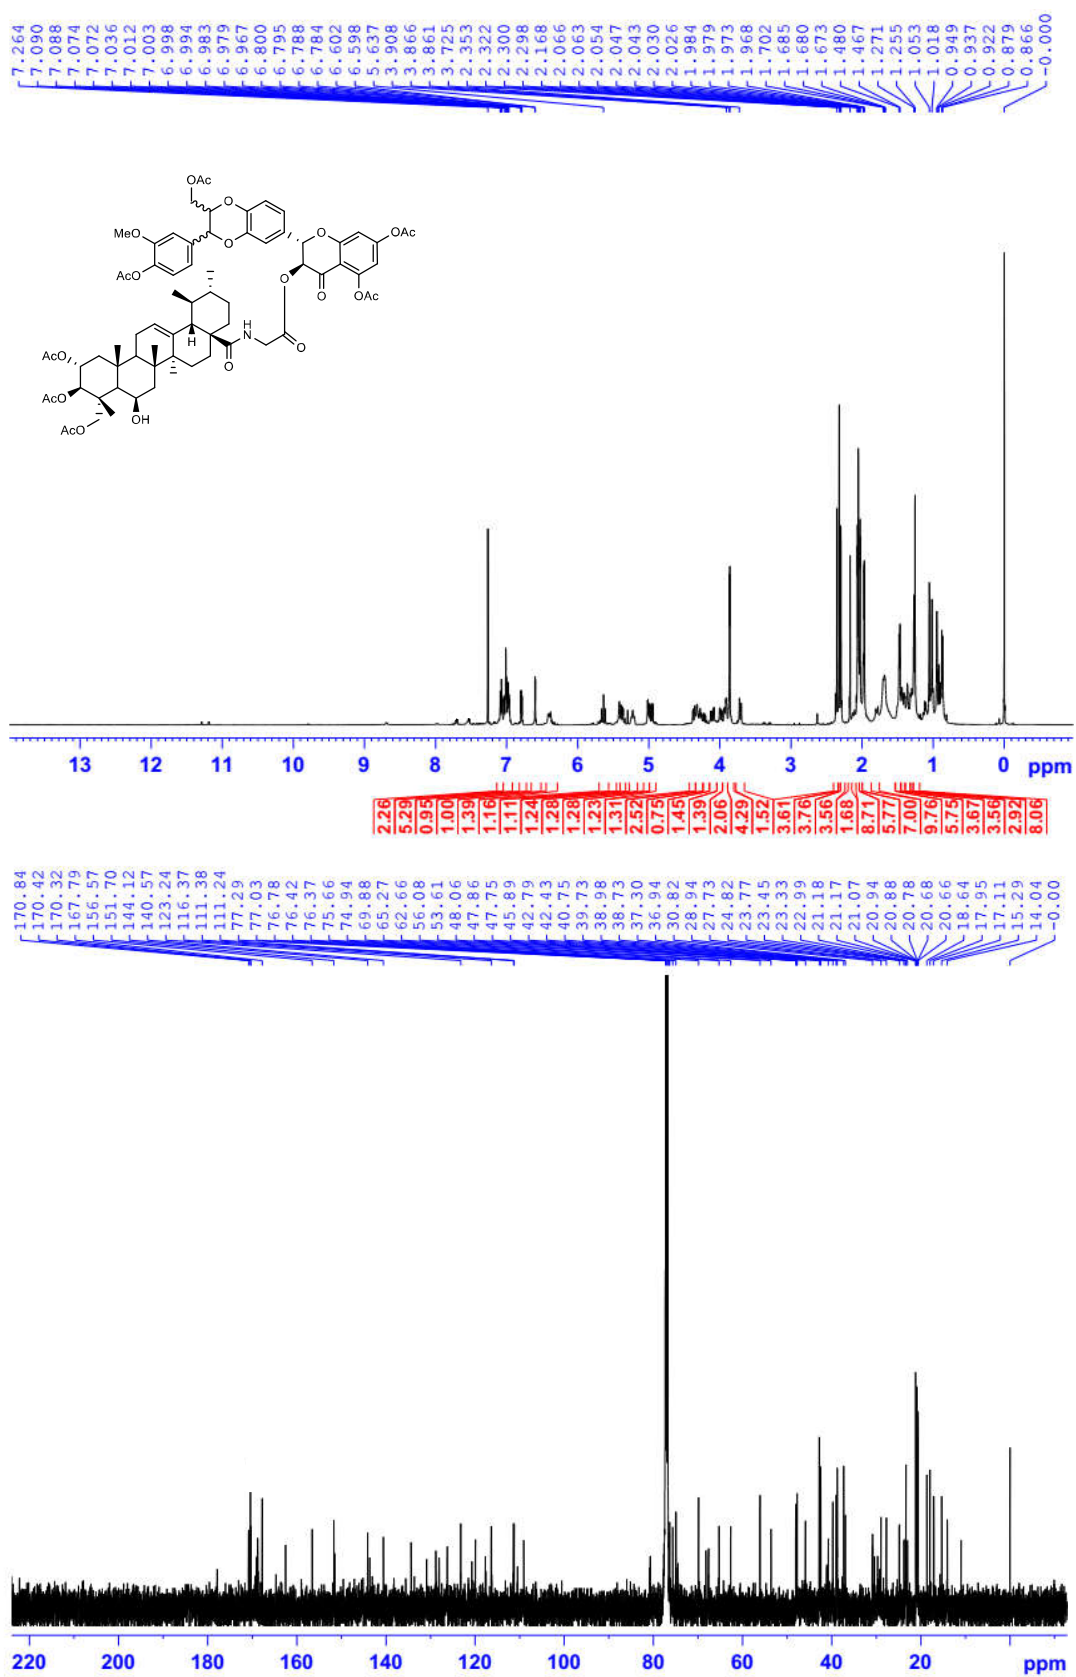

Figure S20. <sup>1</sup>H and <sup>13</sup>C NMR (CDCl<sub>3</sub>, 500 MHz) spectra of compound **11**



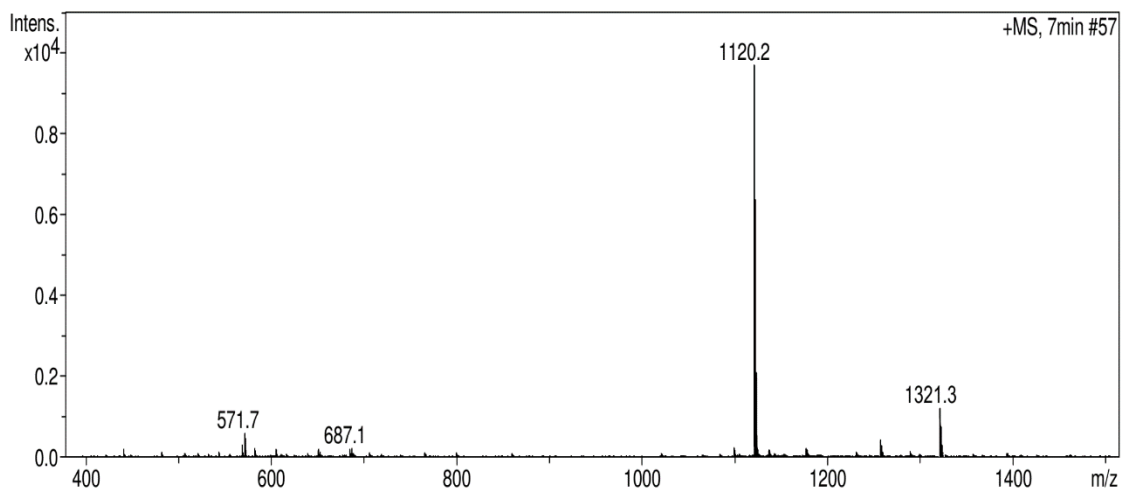

Figure S21. ESI-MS spectrum of compound 11

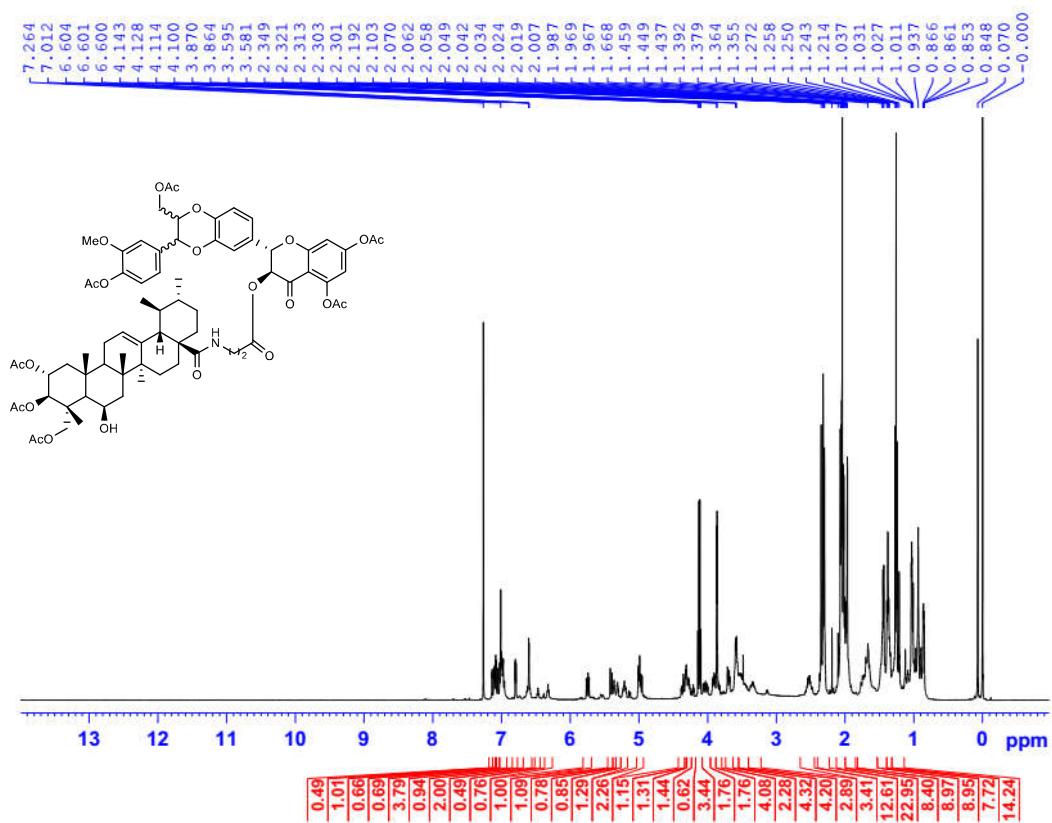

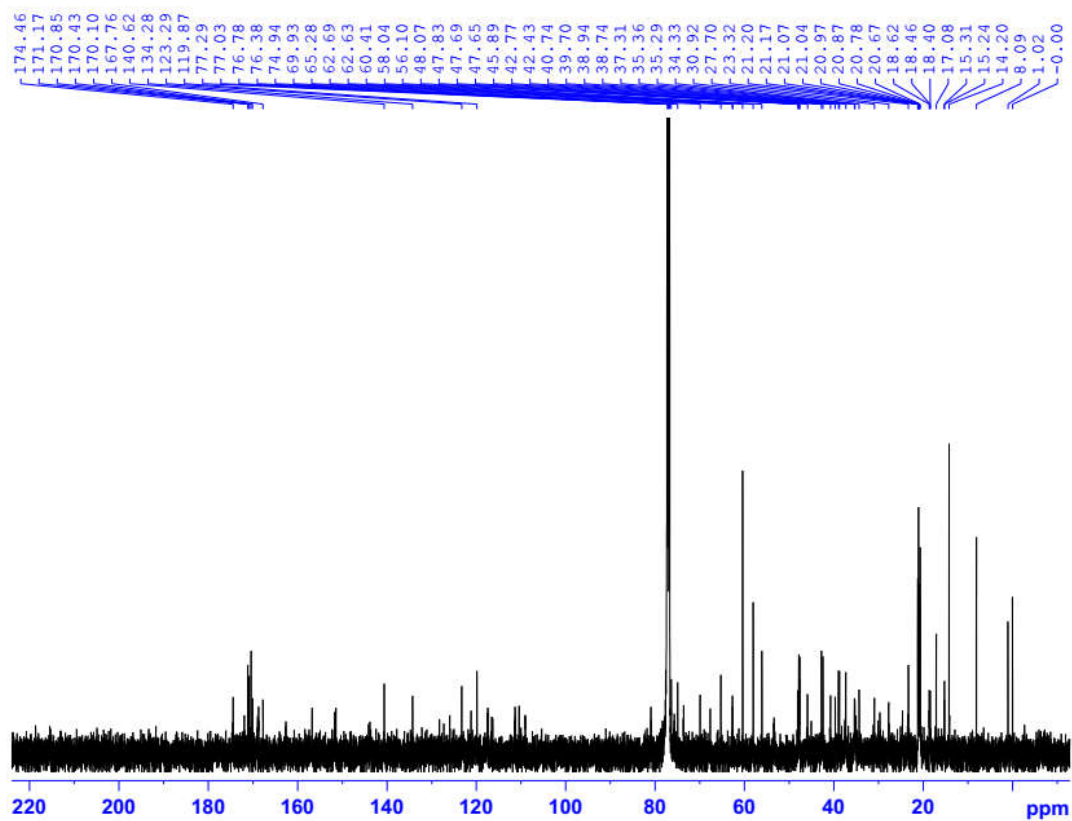

Figure S22.  $^1\text{H}$  and  $^{13}\text{C}$  NMR ( $\text{CDCl}_3$ , 500 MHz) spectra of compound **12**

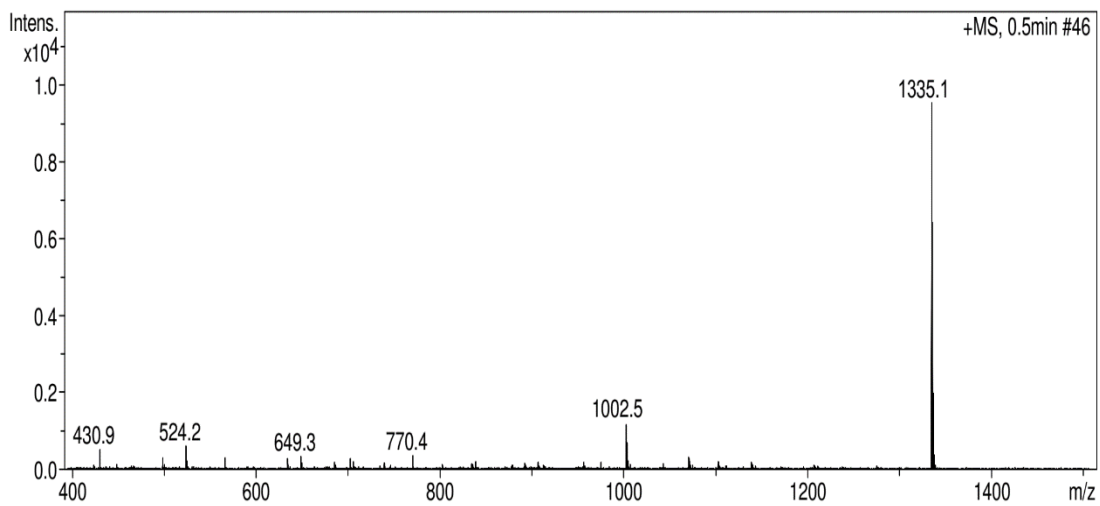

Figure S23. ESI-MS spectrum of compound **12**

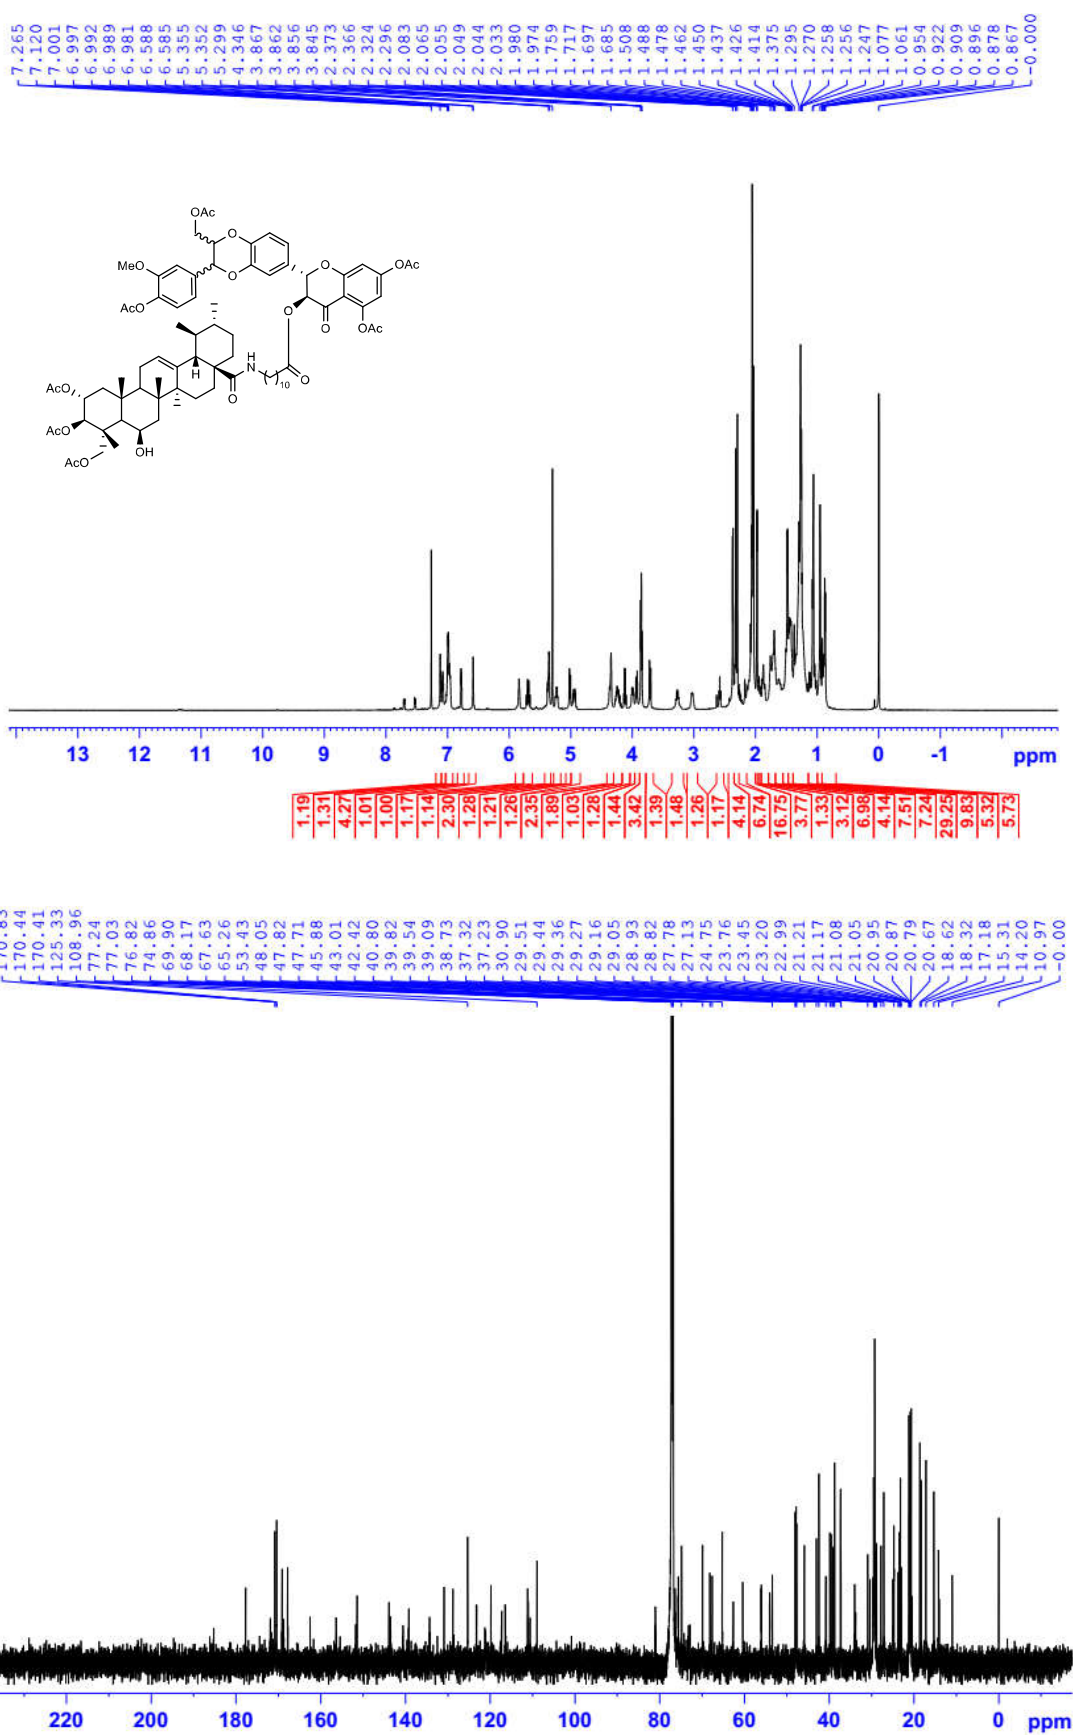

Figure S24. <sup>1</sup>H and <sup>13</sup>C NMR (CDCl<sub>3</sub>, 500 MHz) spectra of compound **13**

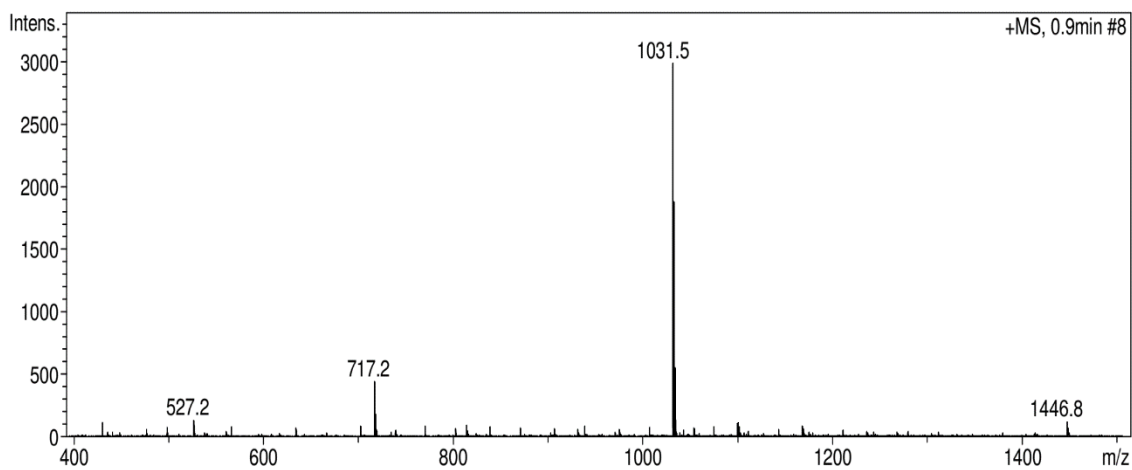

Figure S25. ESI-MS spectrum of compound 13

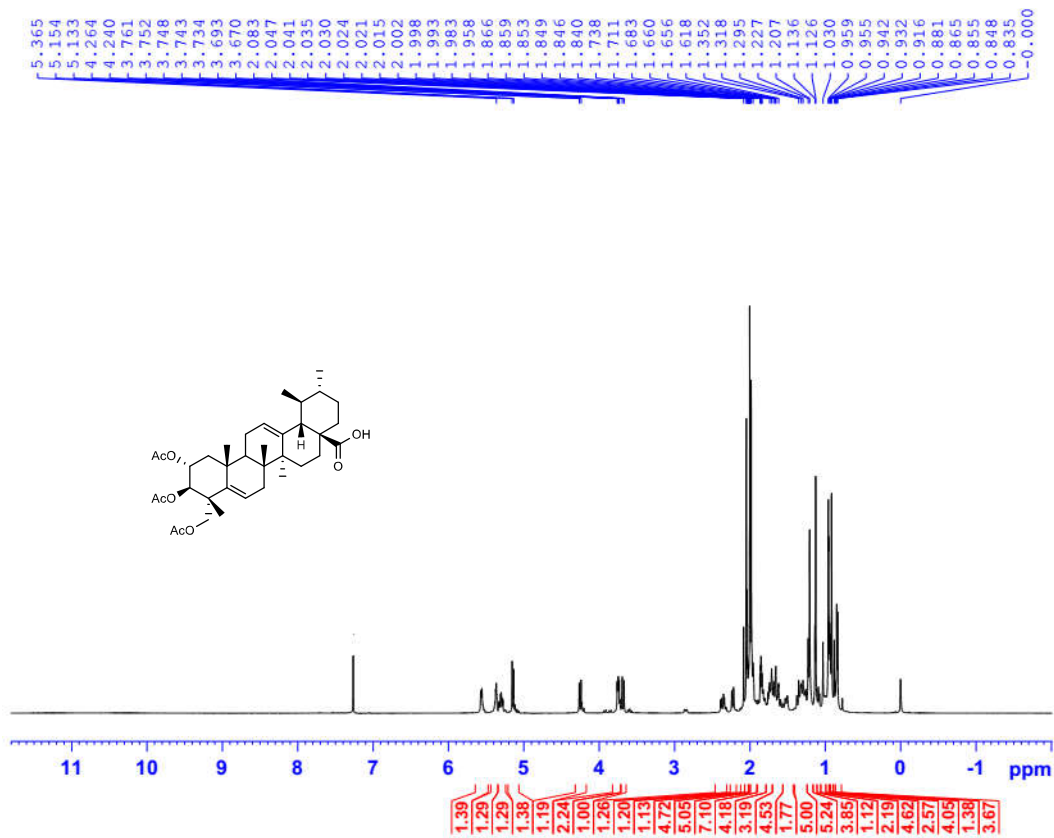

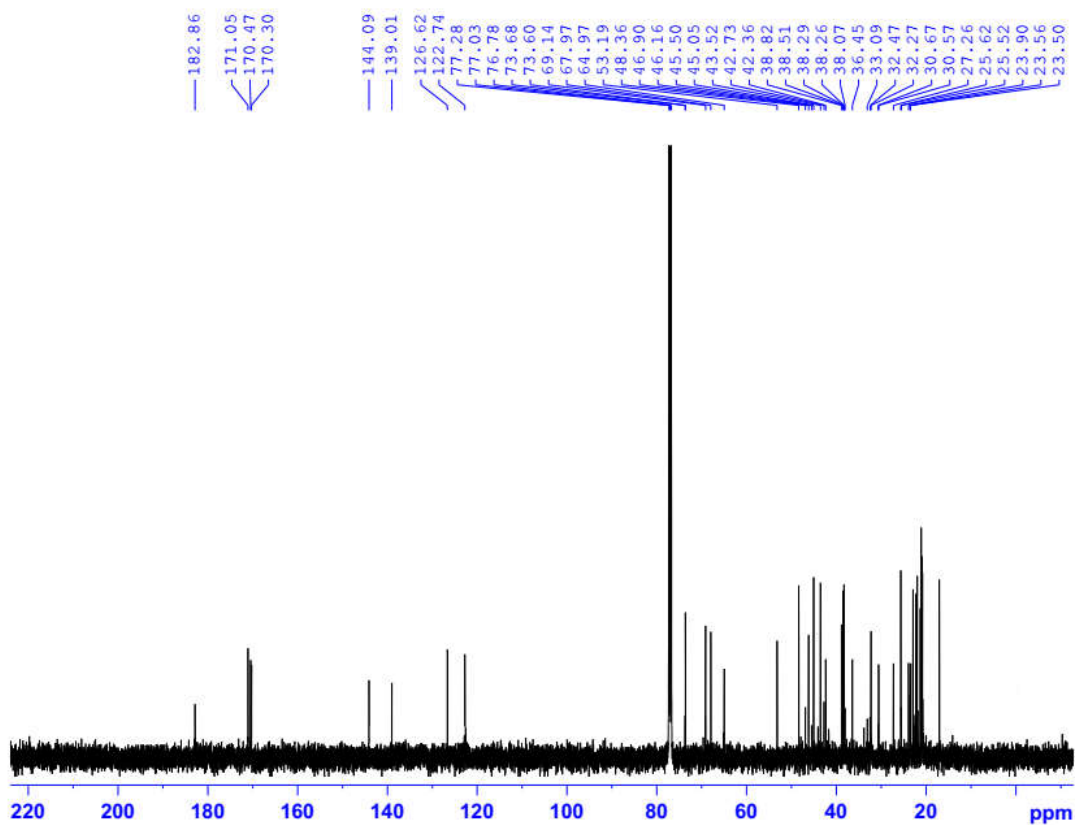

Figure S26.  $^1\text{H}$  and  $^{13}\text{C}$  NMR ( $\text{CDCl}_3$ , 500 MHz) spectra of compound **14**

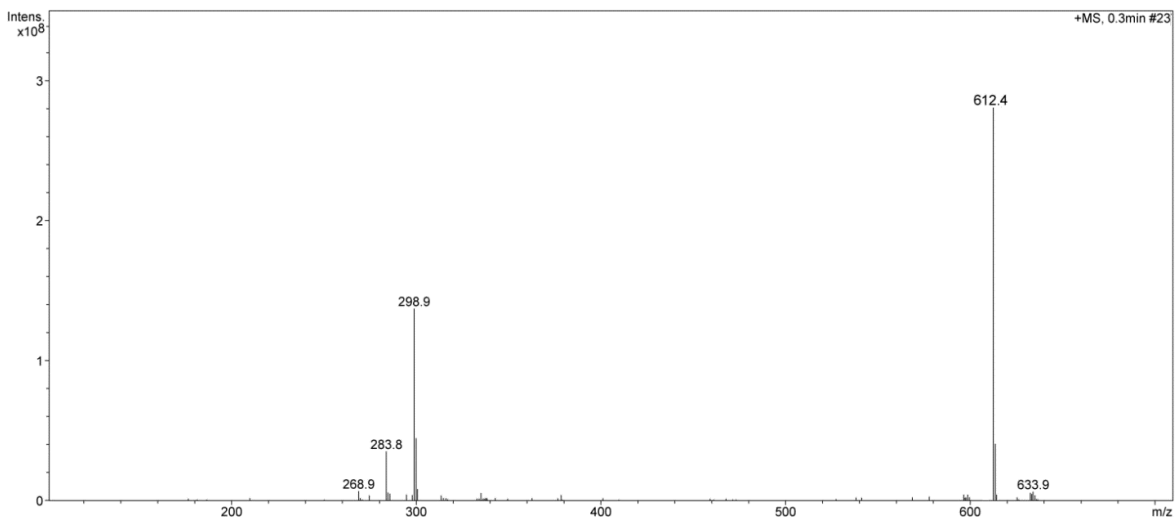

Figure S27. ESI-MS spectrum of compound **14**

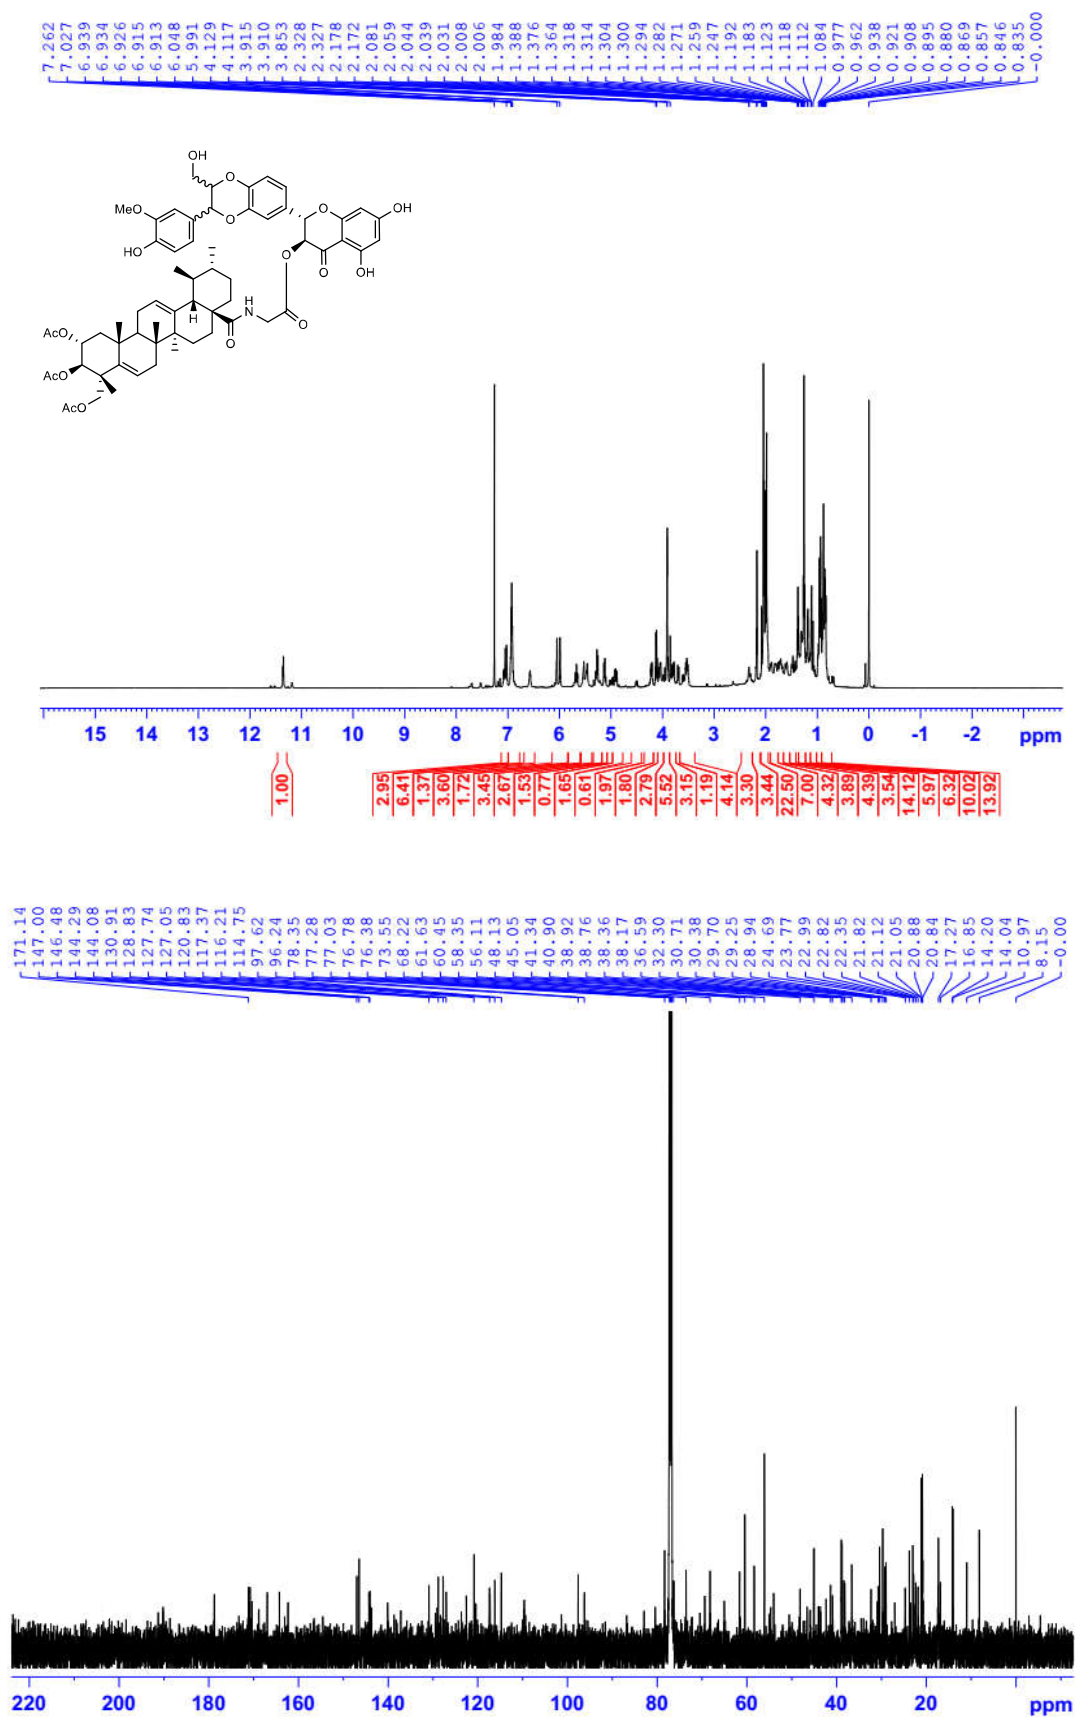

Figure S28. <sup>1</sup>H and <sup>13</sup>C NMR (CDCl<sub>3</sub>, 500 MHz) spectra of compound 15

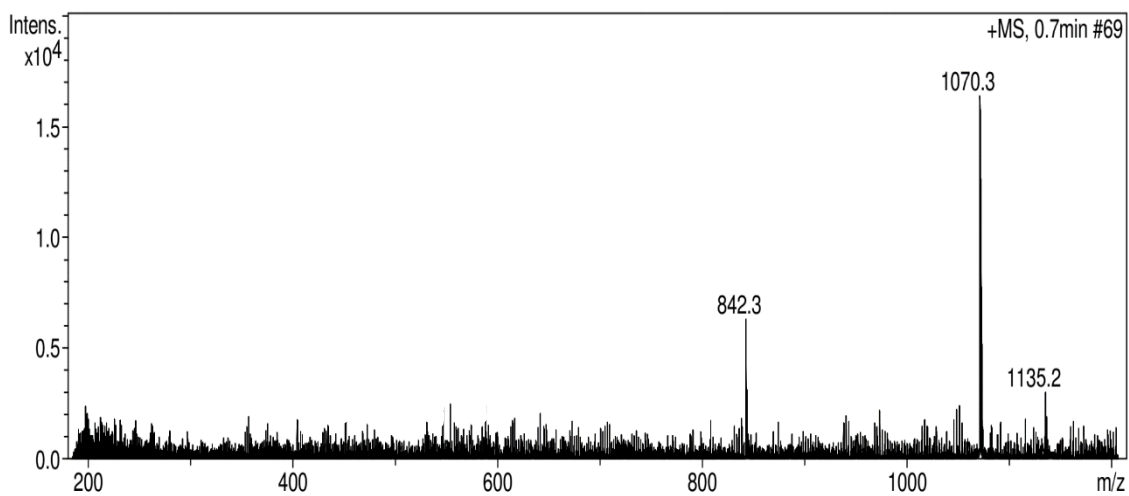

Figure S29. ESI-MS spectrum of compound 15

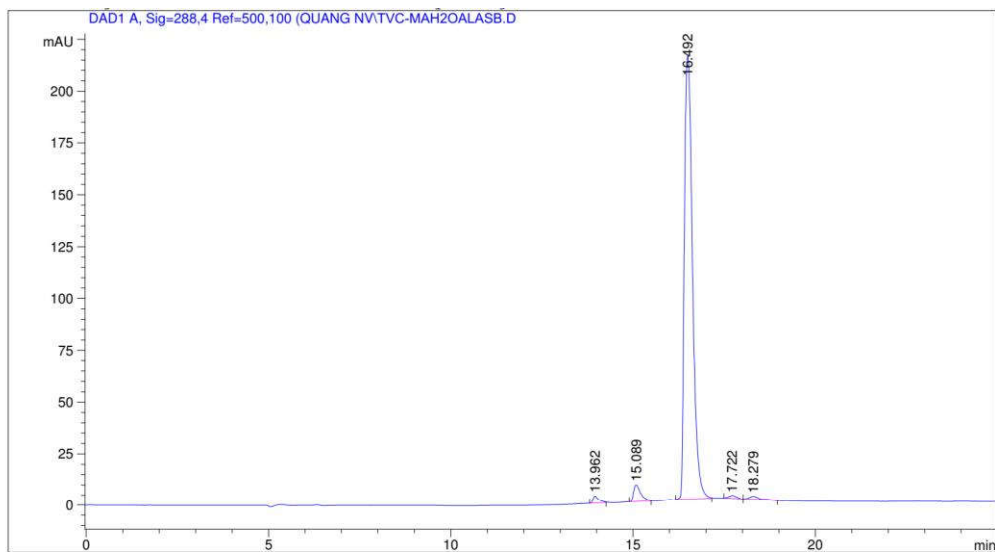

=====  
 Area Percent Report  
 =====

Sorted By : Signal  
 Multiplier : 1.0000  
 Dilution : 1.0000  
 Use Multiplier & Dilution Factor with ISTDs

Signal 1: DAD1 A, Sig=288,4 Ref=500,100

| Peak #   | RetTime [min] | Type | Width [min] | Area [mAU*s] | Height [mAU] | Area %  |
|----------|---------------|------|-------------|--------------|--------------|---------|
| 1        | 13.962        | BB   | 0.1643      | 40.25041     | 4.57196      | 1.1436  |
| 2        | 15.089        | BB   | 0.2027      | 110.67388    | 7.26386      | 3.1445  |
| 3        | 16.492        | BB   | 0.2468      | 3316.17288   | 213.93143    | 94.2195 |
| 4        | 17.722        | BV   | 0.2370      | 23.55582     | 1.36626      | 0.6693  |
| 5        | 18.279        | VB   | 0.2751      | 28.97230     | 1.56911      | 0.8232  |
| Totals : |               |      |             | 3519.62529   | 228.70263    |         |

Figure S30. HPLC analysis of compound 15



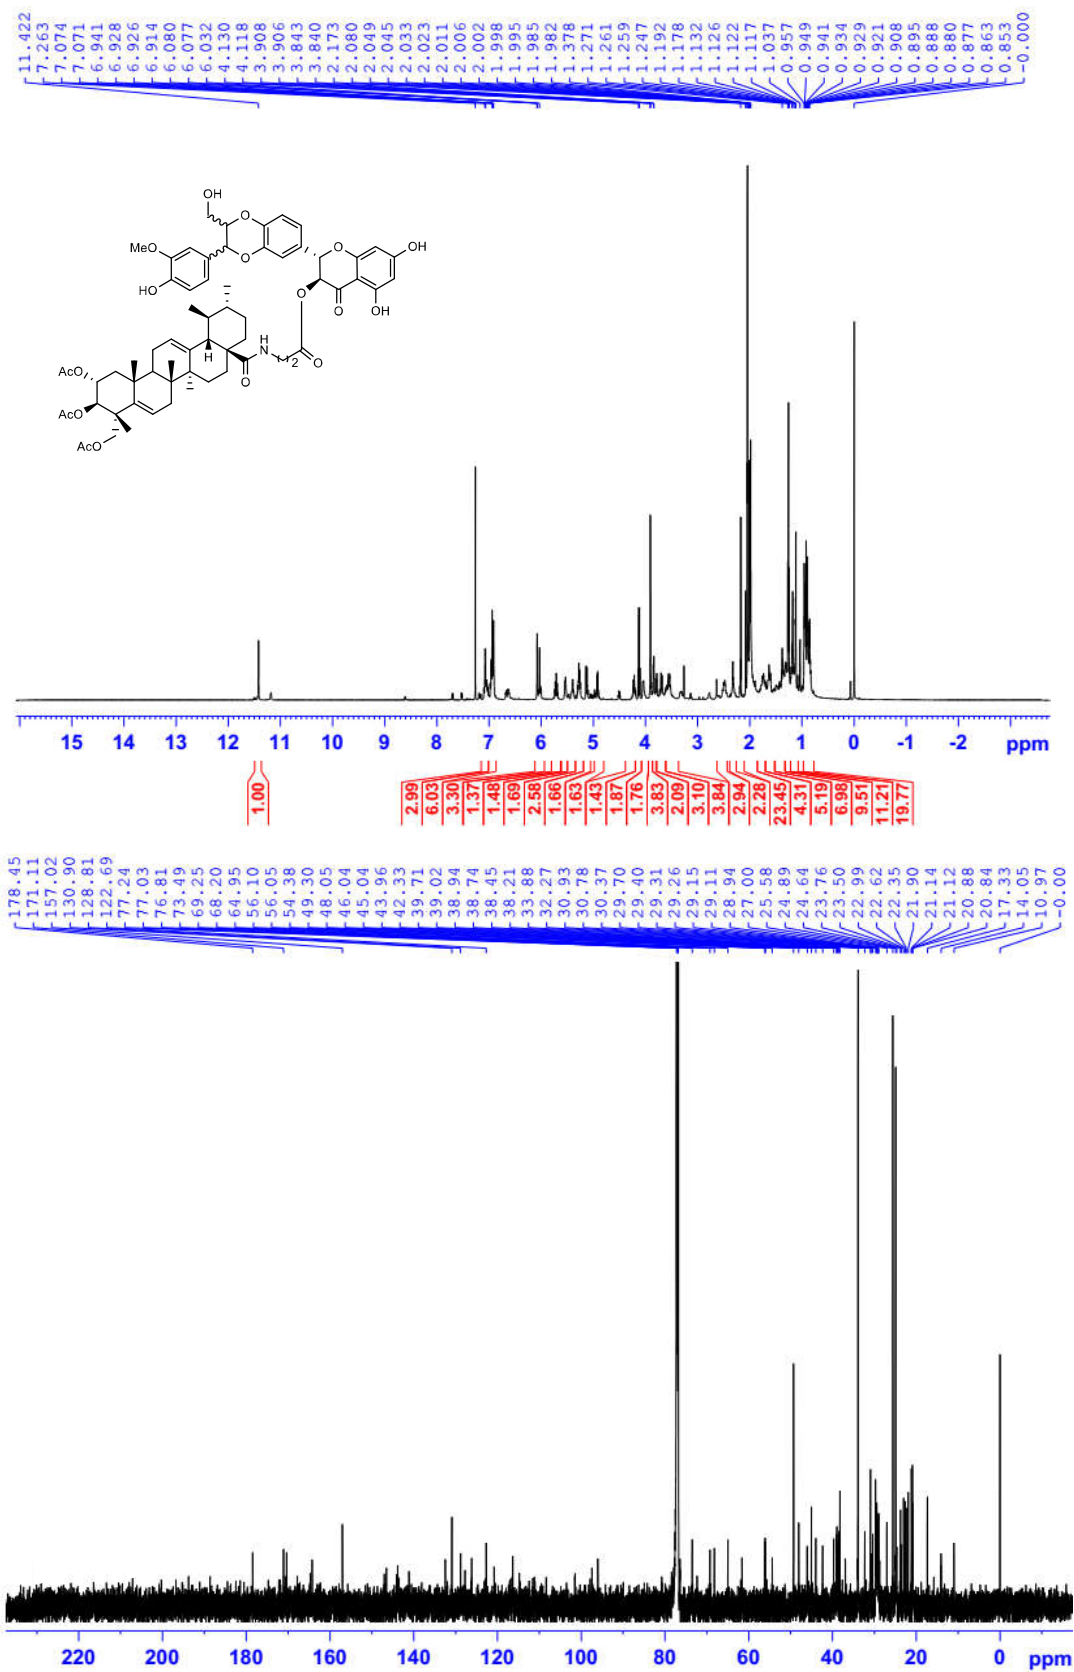

Figure S31. <sup>1</sup>H and <sup>13</sup>C NMR (CDCl<sub>3</sub>, 500 MHz) spectra of compound 16



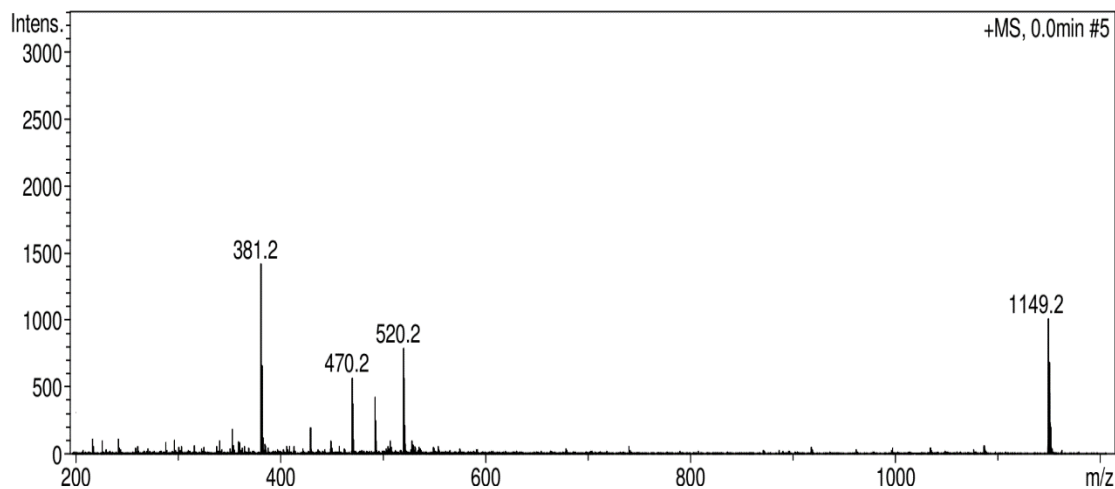

Figure S32. ESI-MS spectrum of compound 16

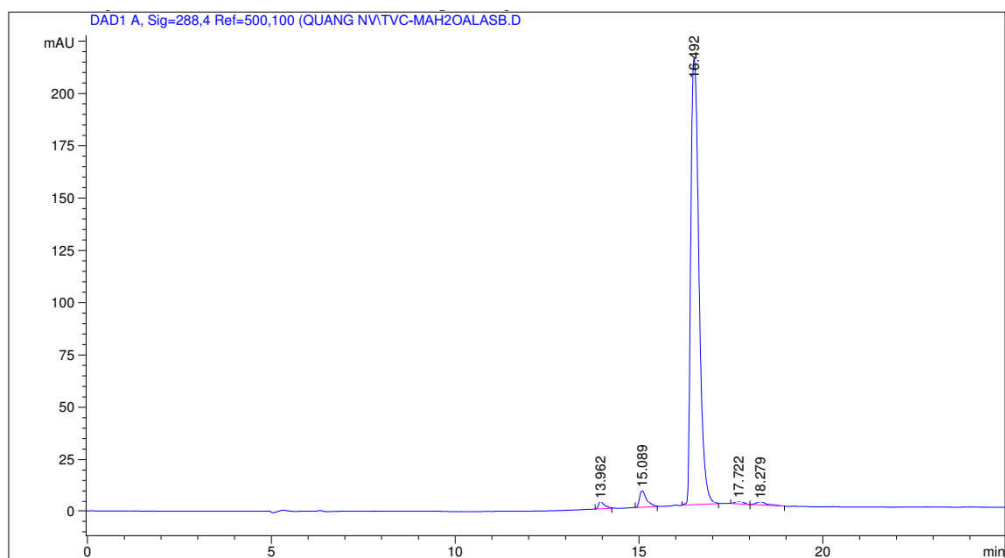

=====  
 Area Percent Report  
 =====

Sorted By : Signal  
 Multiplier : 1.0000  
 Dilution : 1.0000  
 Use Multiplier & Dilution Factor with ISTDs

Signal 1: DAD1 A, Sig=288,4 Ref=500,100

| Peak # | RetTime [min] | Type | Width [min] | Area [mAU*s] | Height [mAU] | Area %  |
|--------|---------------|------|-------------|--------------|--------------|---------|
| 1      | 13.962        | BB   | 0.1643      | 40.25041     | 4.57196      | 1.1436  |
| 2      | 15.089        | BB   | 0.2027      | 110.67388    | 7.26386      | 3.1445  |
| 3      | 16.492        | BB   | 0.2468      | 3316.17288   | 213.93143    | 94.2195 |
| 4      | 17.722        | BV   | 0.2370      | 23.55582     | 1.36626      | 0.6693  |
| 5      | 18.279        | VB   | 0.2751      | 28.97230     | 1.56911      | 0.8232  |

Totals : 3519.62529 228.70263

Figure S33. HPLC analysis of compound 16

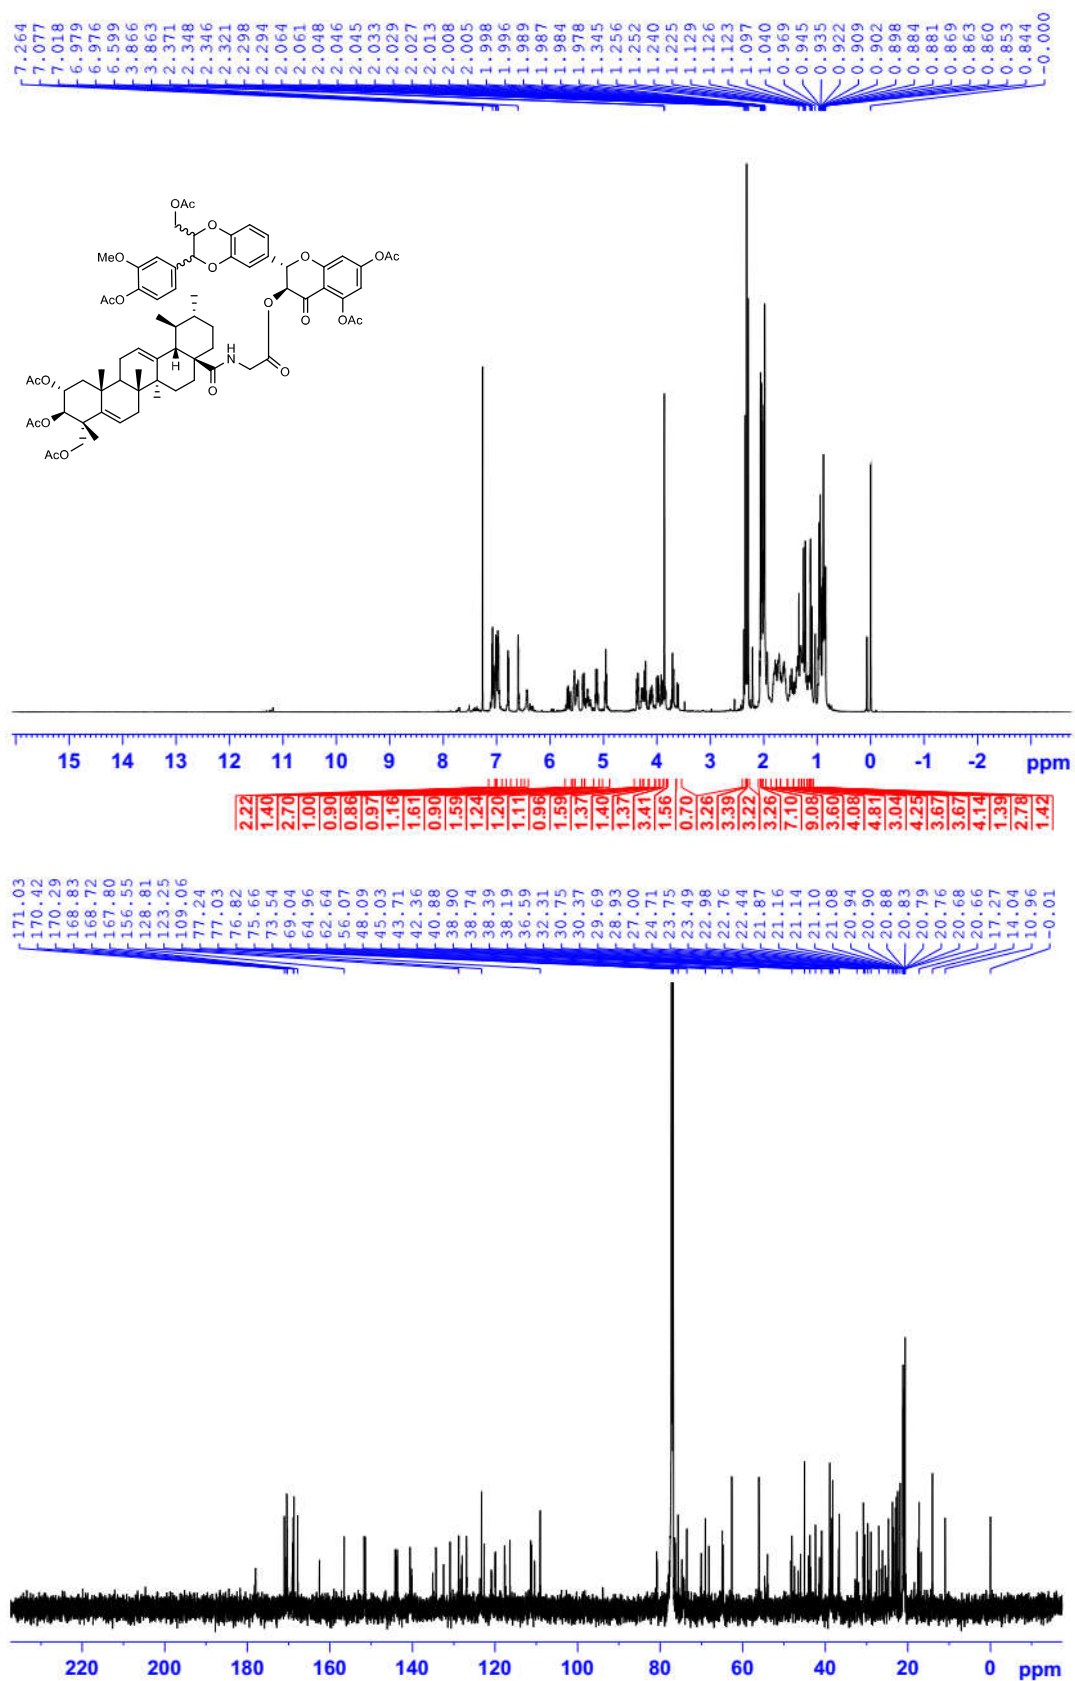

Figure S 34. <sup>1</sup>H and <sup>13</sup>C NMR (CDCl<sub>3</sub>, 500 MHz) spectra of compound 17

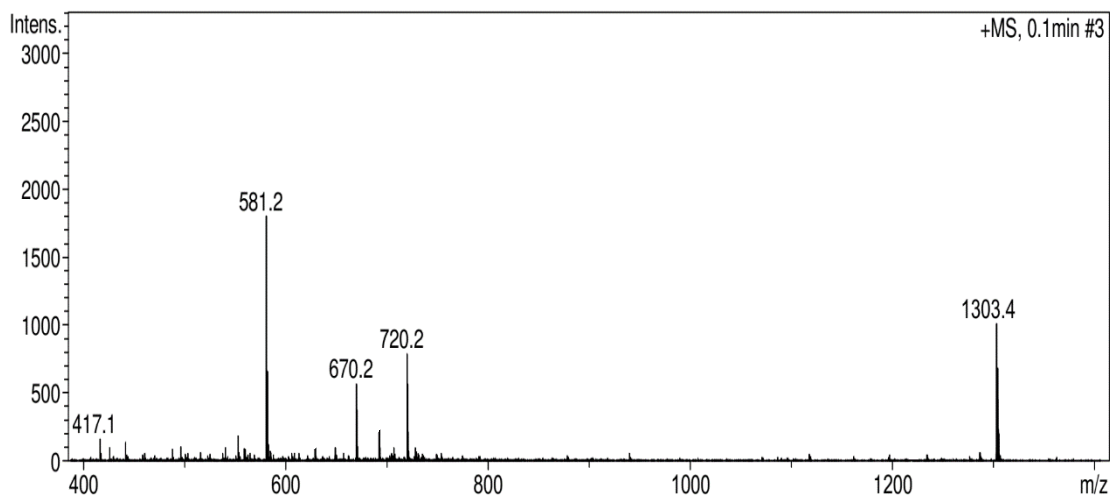

Figure S35. ESI-MS spectrum of compound 17

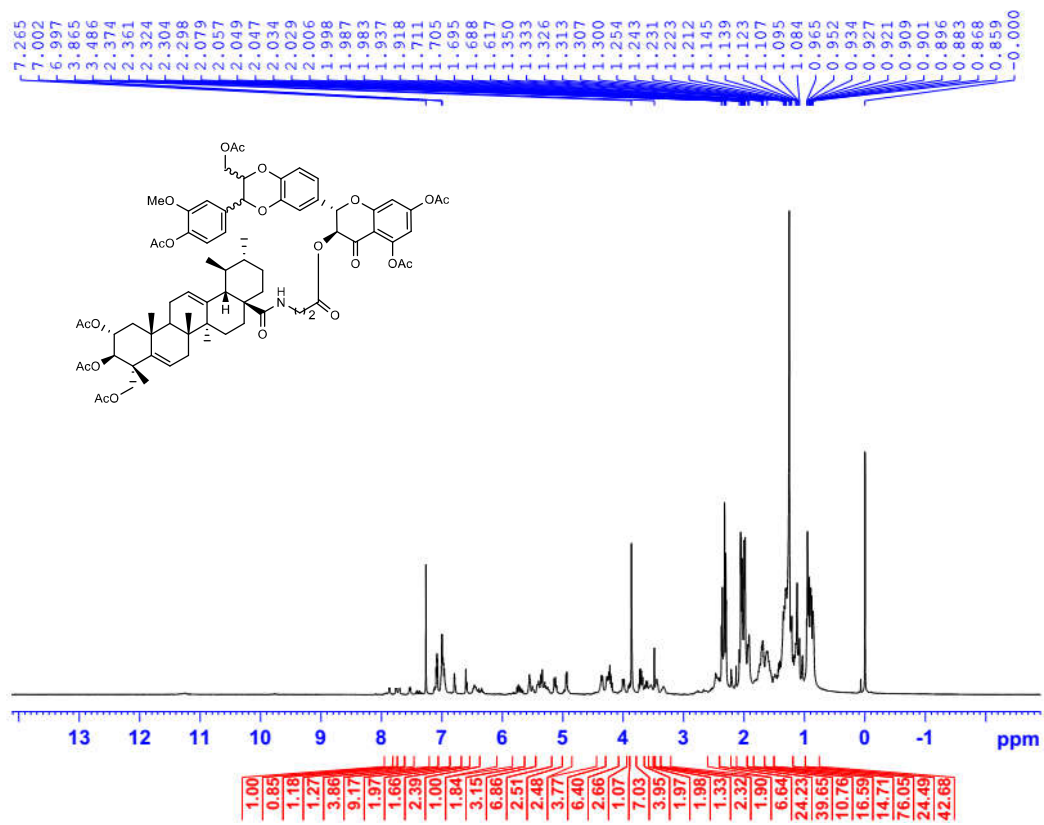

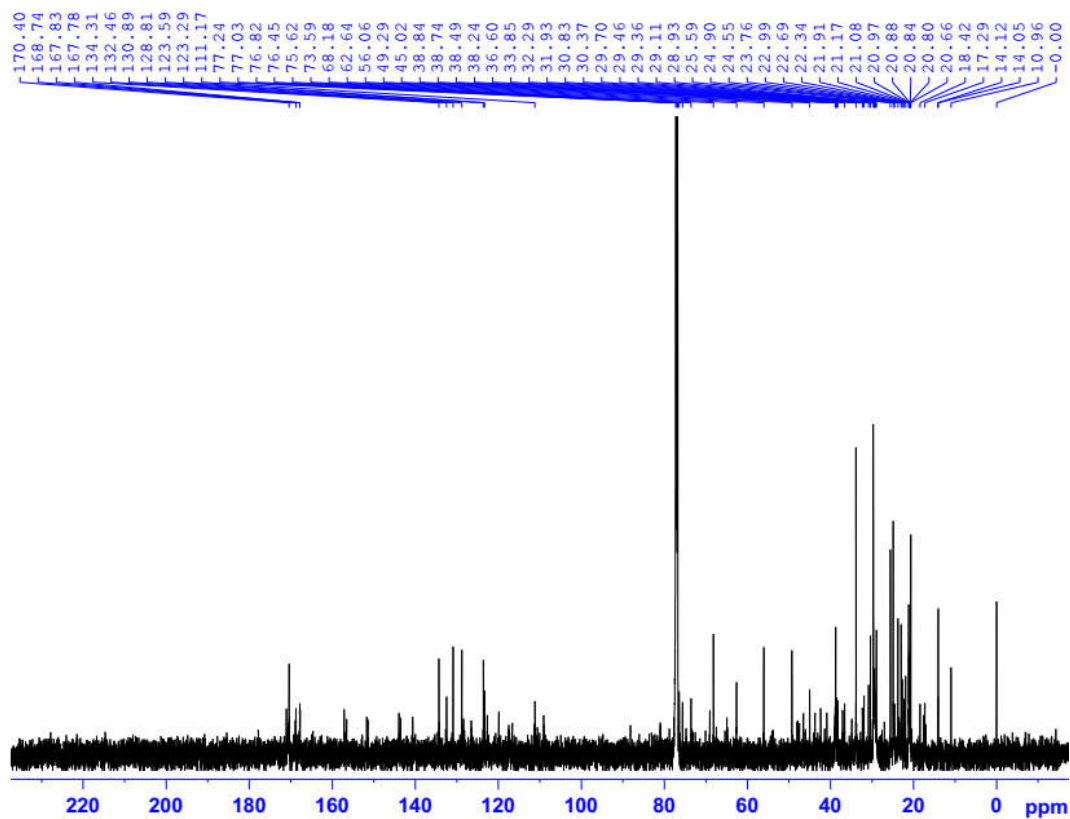

Figure S36. <sup>1</sup>H and <sup>13</sup>C NMR (CDCl<sub>3</sub>, 500 MHz) spectra of compound **18**

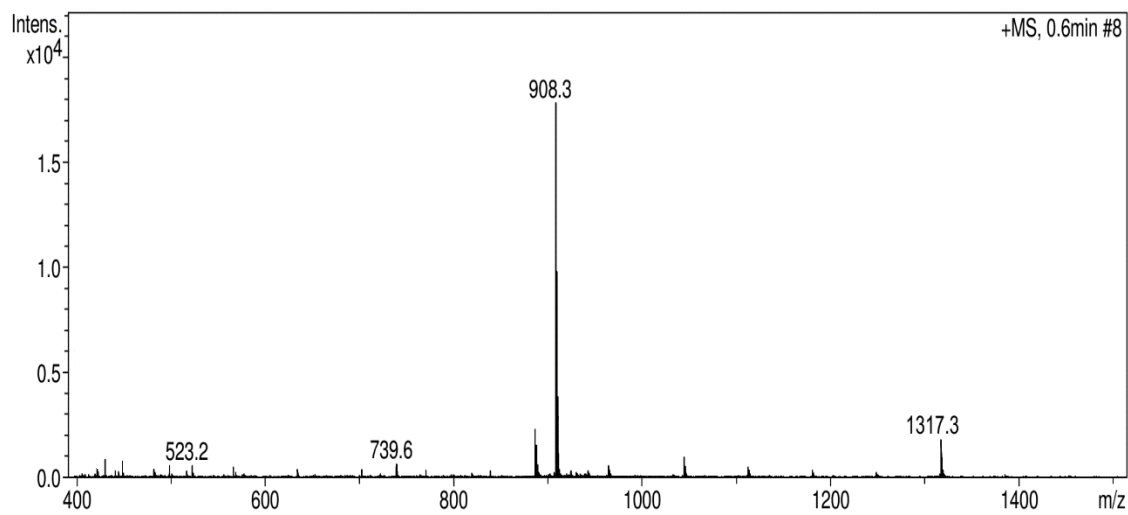

Figure S37. ESI-MS spectrum of compound **18**
